# Supplementary material for: Age structure, carbonate production and shell loss rate in an Early Miocene reef of the giant oyster Crassostrea gryphoides
Source: Copernicus journal article supplement (doi:10.5194/bg-13-1223-2016), 2016-02-29
Supplement: Supplementary file 1 [file Oysters-supplementary table.xlsx]

## Sheet: length-age-volume
LENGTH mm	AREA mm2	AGE - Bertalanffy	VOLUME - Logistic mm3	VOLUME - Logistic cm3	MASS g ( 1,82 g/cm3)	annual growth in mm	volume/year mm3	volume/year cm3	carbonate/year g	VOLUME Gompertz mm3	VOLUME Gompertz cm3	MASS g ( 1,82 g/cm3)	annual growth in mm	volume/year mm3	volume/year cm3	carbonate/year g
338.047	35699	6.86865	641063	641.063	1166.74	49.2159	44015.3	44.0153	80.1078	635975	635.975	1157.47	49.2159	38612.7	38.6127	70.2751
380.213	32137	8.03696	885210	885.21	1611.08	47.3081	43195.5	43.1955	78.6157	878980	878.98	1599.74	47.3081	37755.3	37.7553	68.7146
125.153	12456	2.19486	92552.8	92.5528	168.446	57.0209	47531.9	47.5319	86.508	90120.9	90.1209	164.02	57.0209	42302.1	42.3021	76.9898
130.707	8404	2.29747	97673.7	97.6737	177.766	56.8918	47471.5	47.4715	86.3981	95558.2	95.5582	173.916	56.8918	42238.6	42.2386	76.8743
174.805	15252	3.14263	149246	149.246	271.627	55.6238	46882.7	46.8827	85.3265	149804	149.804	272.643	55.6238	41619.7	41.6197	75.7479
379.803	28140	8.02507	882576	882.576	1606.29	47.3271	43203.6	43.2036	78.6305	876297	876.297	1594.86	47.3271	37763.7	37.7637	68.73
278.718	15925	5.38639	388778	388.778	707.577	51.7448	45125.6	45.1256	82.1287	390269	390.269	710.29	51.7448	39775.7	39.7757	72.3918
322.942	21640	6.47473	566974	566.974	1031.89	49.8773	44303	44.303	80.6315	563739	563.739	1026.01	49.8773	38913.9	38.9139	70.8233
281.86	21708	5.46074	399647	399.647	727.357	51.6157	45068.3	45.0683	82.0243	400899	400.899	729.636	51.6157	39715.6	39.7156	72.2823
347.038	32428	7.109	688516	688.516	1253.1	48.8167	43842.5	43.8425	79.7933	682488	682.488	1242.13	48.8167	38431.8	38.4318	69.946
361.111	25112	7.49449	767839	767.839	1397.47	48.1836	43569.8	43.5698	79.297	760890	760.89	1384.82	48.1836	38146.6	38.1466	69.4268
348.984	27450	7.16162	699118	699.118	1272.4	48.7297	43804.9	43.8049	79.7249	692915	692.915	1261.11	48.7297	38392.6	38.3926	69.8745
350.545	32121	7.20399	707708	707.708	1288.03	48.6598	43774.8	43.7748	79.67	701374	701.374	1276.5	48.6598	38361	38.361	69.8171
406.139	32335	8.81194	1.06127e+06	1061.27	1931.51	46.0896	42679.8	42.6798	77.6772	1.06274e+06	1062.74	1934.19	46.0896	37216.5	37.2165	67.7341
252.317	17560	4.7781	307190	307.19	559.087	52.8069	45600.2	45.6002	82.9923	309941	309.941	564.093	52.8069	40273.3	40.2733	73.2974
263.394	20726	5.02982	339372	339.372	617.657	52.3665	45402.8	45.4028	82.6331	341755	341.755	621.994	52.3665	40066.3	40.0663	72.9206
297.968	20374	5.84883	459530	459.53	836.344	50.9449	44771.5	44.7715	81.4841	459284	459.284	835.897	50.9449	39404.5	39.4045	71.7162
390.329	30955	8.3338	951719	951.719	1732.13	46.8368	42995.3	42.9953	78.2515	947327	947.327	1724.14	46.8368	37546.1	37.5461	68.3339
295.378	20552	5.78563	449419	449.419	817.943	51.0537	44819.5	44.8195	81.5715	449444	449.444	817.988	51.0537	39454.8	39.4548	71.8078
368.518	33614	7.70212	812043	812.043	1477.92	47.8463	43425.2	43.4252	79.0339	805033	805.033	1465.16	47.8463	37995.4	37.9954	69.1517
225.368	11448	4.18556	240058	240.058	436.905	53.8441	46068.3	46.0683	83.8443	242827	242.827	441.945	53.8441	40764.5	40.7645	74.1914
215.144	16112	3.96773	218320	218.32	397.343	54.2234	46240.7	46.2407	84.1581	220826	220.826	401.903	54.2234	40945.5	40.9455	74.5207
233.343	17008	4.35808	258378	258.378	470.248	53.5426	45931.7	45.9317	83.5958	261259	261.259	475.491	53.5426	40621.2	40.6212	73.9305
295.384	21466	5.78578	449443	449.443	817.986	51.0535	44819.4	44.8194	81.5712	449466	449.466	818.029	51.0535	39454.7	39.4547	71.8076
312.1	24210	6.19925	518073	518.073	942.893	50.3448	44507.6	44.5076	81.0038	516199	516.199	939.482	50.3448	39128.1	39.1281	71.2131
116.457	9211	2.03584	85054.6	85.0546	154.799	57.2034	47617.3	47.6173	86.6636	82147.9	82.1479	149.509	57.2034	42392	42.392	77.1534
270.77	22683	5.20022	362421	362.421	659.607	52.069	45270	45.27	82.3913	364431	364.431	663.265	52.069	39927	39.927	72.6671
347.973	36234	7.13426	693596	693.596	1262.34	48.7749	43824.4	43.8244	79.7604	687482	687.482	1251.22	48.7749	38413	38.413	69.9116
162.342	9135	2.89807	132489	132.489	241.131	56.0172	47064.6	47.0646	85.6575	132293	132.293	240.773	56.0172	41810.9	41.8109	76.0958
220.497	17963	4.08132	229464	229.464	417.624	54.0259	46150.8	46.1508	83.9945	232123	232.123	422.464	54.0259	40851.1	40.8511	74.3491
259.132	17302	4.93238	326651	326.651	594.506	52.5369	45479	45.479	82.7719	329203	329.203	599.15	52.5369	40146.2	40.1462	73.0662
264.923	20692	5.06496	344041	344.041	626.154	52.3051	45375.3	45.3753	82.5831	346355	346.355	630.367	52.3051	40037.5	40.0375	72.8682
188.951	14900	3.42597	170705	170.705	310.684	55.1525	46665.6	46.6656	84.9314	172064	172.064	313.156	55.1525	41391.7	41.3917	75.3329
285.568	14986	5.54904	412808	412.808	751.31	51.4625	45000.3	45.0003	81.9006	413755	413.755	753.034	51.4625	39644.4	39.6444	72.1527
159.722	15812	2.84725	129203	129.203	235.15	56.0969	47101.5	47.1015	85.7248	128845	128.845	234.498	56.0969	41849.7	41.8497	76.1665
234.158	12636	4.37584	260320	260.32	473.783	53.5115	45917.7	45.9177	83.5702	263208	263.208	479.038	53.5115	40606.4	40.6064	73.9037
358.612	31748	7.42518	753305	753.305	1371.01	48.2967	43618.4	43.6184	79.3855	746453	746.453	1358.54	48.2967	38197.5	38.1975	69.5194
348.54	22985	7.1496	696689	696.689	1267.97	48.7496	43813.5	43.8135	79.7405	690525	690.525	1256.75	48.7496	38401.5	38.4015	69.8908
249.836	14239	4.72239	300367	300.367	546.669	52.9045	45644	45.644	83.0721	303170	303.17	551.769	52.9045	40319.3	40.3193	73.3811
236.666	12628	4.43066	266382	266.382	484.816	53.4156	45874.3	45.8743	83.4913	269282	269.282	490.094	53.4156	40560.9	40.5609	73.8209
298.211	19490	5.85477	460488	460.488	838.088	50.9347	44766.9	44.7669	81.4758	460216	460.216	837.594	50.9347	39399.8	39.3998	71.7076
245.133	19241	4.61745	287806	287.806	523.807	53.0884	45726.7	45.7267	83.2227	290677	290.677	529.031	53.0884	40406.1	40.4061	73.539
341.143	21349	6.95091	657120	657.12	1195.96	49.0789	43955.9	43.9559	79.9997	651687	651.687	1186.07	49.0789	38550.5	38.5505	70.162
198.575	14930	3.62238	186938	186.938	340.227	54.8189	46512.6	46.5126	84.6529	188781	188.781	343.582	54.8189	41231	41.231	75.0404
193.219	15595	3.51271	177733	177.733	323.474	55.0057	46598.3	46.5983	84.8088	179314	179.314	326.351	55.0057	41320.9	41.3209	75.2041
162.244	8640	2.89617	132365	132.365	240.905	56.0202	47066	47.066	85.6601	132162	132.162	240.536	56.0202	41812.3	41.8123	76.0984
215.239	22269	3.96974	218514	218.514	397.695	54.2199	46239.1	46.2391	84.1552	221022	221.022	402.26	54.2199	40943.8	40.9438	74.5177
266.993	21521	5.11268	350452	350.452	637.823	52.2217	45338.1	45.3381	82.5154	352666	352.666	641.853	52.2217	39998.5	39.9985	72.7972
212.549	16071	3.91303	213101	213.101	387.844	54.3183	46283.9	46.2839	84.2367	215520	215.52	392.246	54.3183	40990.8	40.9908	74.6033
191.589	11523	3.47951	175017	175.017	318.532	55.062	46624.1	46.6241	84.8558	176515	176.515	321.257	55.062	41348	41.348	75.2534
181.007	9379	3.26609	158319	158.319	288.14	55.4202	46788.8	46.7888	85.1555	159238	159.238	289.813	55.4202	41521	41.521	75.5683
265.772	23348	5.08451	346658	346.658	630.917	52.2709	45360.1	45.3601	82.5554	348932	348.932	635.056	52.2709	40021.5	40.0215	72.8391
174.352	12208	3.13366	148603	148.603	270.457	55.6385	46889.4	46.8894	85.3388	149134	149.134	271.424	55.6385	41626.8	41.6268	75.7608
177.987	10118	3.20582	153837	153.837	279.984	55.5199	46834.7	46.8347	85.2392	154582	154.582	281.34	55.5199	41569.4	41.5694	75.6562
179.656	10754	3.23909	156299	156.299	284.464	55.4649	46809.4	46.8094	85.1931	157141	157.141	285.996	55.4649	41542.7	41.5427	75.6077
210.596	13218	3.87201	209250	209.25	380.834	54.3893	46316.3	46.3163	84.2957	211599	211.599	385.11	54.3893	41024.8	41.0248	74.6652
215.403	11409	3.97321	218848	218.848	398.303	54.2139	46236.4	46.2364	84.1502	221361	221.361	402.877	54.2139	40940.9	40.9409	74.5125
205.993	13167	3.77585	200427	200.427	364.778	54.5554	46392.1	46.3921	84.4336	202598	202.598	368.728	54.5554	41104.4	41.1044	74.81
95.408	8971	1.65889	69270.6	69.2706	126.073	57.5133	47762.8	47.7628	86.9282	65343.9	65.3439	118.926	57.5133	42544.9	42.5449	77.4317
356.314	26477	7.36178	740110	740.11	1347	48.4005	43663	43.663	79.4667	733376	733.376	1334.74	48.4005	38244.1	38.2441	69.6043
400.399	24696	8.63628	1.02074e+06	1020.74	1857.75	46.3624	42794.7	42.7947	77.8864	1.01959e+06	1019.59	1855.66	46.3624	37336.5	37.3365	67.9525
150.442	14468	2.66883	118182	118.182	215.091	56.3699	47228.3	47.2283	85.9554	117251	117.251	213.397	56.3699	41982.9	41.9829	76.4089
303.472	17704	5.98417	481645	481.645	876.594	50.7124	44669.1	44.6691	81.2977	480794	480.794	875.045	50.7124	39297.2	39.2972	71.521
279.439	24091	5.40342	391250	391.25	712.074	51.7153	45112.5	45.1125	82.1047	392687	392.687	714.691	51.7153	39761.9	39.7619	72.3667
220.321	16896	4.07757	229089	229.089	416.942	54.0324	46153.8	46.1538	83.9999	231744	231.744	421.774	54.0324	40854.3	40.8543	74.3547
206.338	10664	3.78303	201076	201.076	365.959	54.543	46386.4	46.3864	84.4233	203261	203.261	369.935	54.543	41098.5	41.0985	74.7992
187.258	11412	3.39173	167991	167.991	305.744	55.2101	46692.1	46.6921	84.9797	169259	169.259	308.051	55.2101	41419.5	41.4195	75.3835
154.806	9203	2.75243	123247	123.247	224.31	56.2435	47169.5	47.1695	85.8485	122586	122.586	223.106	56.2435	41921.1	41.9211	76.2965
216.44	11278	3.99514	220971	220.971	402.168	54.1758	46219	46.219	84.1186	223517	223.517	406.801	54.1758	40922.7	40.9227	74.4793
192.138	16095	3.49068	175928	175.928	320.188	55.0431	46615.4	46.6154	84.84	177453	177.453	322.965	55.0431	41338.9	41.3389	75.2368
121.351	8977	2.12509	89198.6	89.1986	162.342	57.1039	47570.7	47.5707	86.5787	86555.8	86.5558	157.531	57.1039	42342.9	42.3429	77.0641
179.532	15737	3.23662	156115	156.115	284.129	55.469	46811.3	46.8113	85.1965	156949	156.949	285.648	55.469	41544.7	41.5447	75.6114
103.045	5283	1.79438	74635.4	74.6354	135.836	57.4266	47722.1	47.7221	86.8541	71055.8	71.0558	129.322	57.4266	42502.1	42.5021	77.3538
132.533	5044	2.33138	99416.4	99.4164	180.938	56.8475	47450.8	47.4508	86.3604	97407.1	97.4071	177.281	56.8475	42216.8	42.2168	76.8346
305.479	17086	6.03388	489925	489.925	891.664	50.6273	44631.6	44.6316	81.2295	488843	488.843	889.695	50.6273	39258	39.258	71.4495
118.017	5595	2.06422	86354.8	86.3548	157.166	57.1726	47602.9	47.6029	86.6373	83531.2	83.5312	152.027	57.1726	42376.8	42.3768	77.1258
244.716	13863	4.60819	286715	286.715	521.822	53.1046	45734	45.734	83.236	289590	289.59	527.054	53.1046	40413.7	40.4137	73.553
129.962	7164	2.28365	96971.1	96.9711	176.487	56.9097	47479.8	47.4798	86.4133	94812.7	94.8127	172.559	56.9097	42247.4	42.2474	76.8902
194.627	12555	3.54145	180111	180.111	327.801	54.9569	46575.9	46.5759	84.7681	181762	181.762	330.808	54.9569	41297.4	41.2974	75.1613
190.24	10039	3.45211	172800	172.8	314.495	55.1084	46645.4	46.6454	84.8946	174227	174.227	317.092	55.1084	41370.4	41.3704	75.2941
167.365	8751	2.99608	139014	139.014	253.006	55.8614	46992.4	46.9924	85.5262	139125	139.125	253.208	55.8614	41735	41.735	75.9578
195.293	12562	3.55507	181246	181.246	329.867	54.9337	46565.2	46.5652	84.7487	182930	182.93	332.933	54.9337	41286.2	41.2862	75.1409
78.133	6224	1.35758	58489.8	58.4898	106.451	57.553	47781.4	47.7814	86.9622	53883.4	53.8834	98.0678	57.553	42564.6	42.5646	77.4675
154.907	11327	2.75437	123367	123.367	224.528	56.2405	47168.1	47.1681	85.846	122712	122.712	223.335	56.2405	41919.7	41.9197	76.2938
119.709	7189	2.09508	87786.8	87.7868	159.772	57.1382	47586.8	47.5868	86.6079	85054.5	85.0545	154.799	57.1382	42359.8	42.3598	77.0949
169.174	13700	3.03156	141439	141.439	257.419	55.8043	46966.1	46.9661	85.4782	141660	141.66	257.82	55.8043	41707.3	41.7073	75.9073
130.814	6203	2.29945	97775	97.775	177.95	56.8892	47470.3	47.4703	86.396	95665.7	95.6657	174.112	56.8892	42237.4	42.2374	76.872
131.951	7931	2.32056	98857.7	98.8577	179.921	56.8617	47457.4	47.4574	86.3725	96814.4	96.8144	176.202	56.8617	42223.8	42.2238	76.8474
276.242	20644	5.3281	380395	380.395	692.318	51.8462	45170.7	45.1707	82.2107	382060	382.06	695.349	51.8462	39823	39.823	72.4778
172.809	12054	3.10315	146433	146.433	266.507	55.6883	46912.4	46.9124	85.3806	146872	146.872	267.307	55.6883	41651	41.651	75.8048
212.18	16980	3.90527	212368	212.368	386.51	54.3317	46290	46.29	84.2479	214774	214.774	390.889	54.3317	40997.3	40.9973	74.615
318.196	23222	6.35341	545134	545.134	992.144	50.0827	44392.8	44.3928	80.7949	542500	542.5	987.351	50.0827	39007.9	39.0079	70.9943
190.014	14583	3.44752	172431	172.431	313.824	55.1161	46648.9	46.6489	84.901	173846	173.846	316.399	55.1161	41374.1	41.3741	75.3009
190.989	14514	3.46732	174028	174.028	316.731	55.0827	46633.6	46.6336	84.8731	175494	175.494	319.399	55.0827	41358	41.358	75.2716
311.622	25726	6.18724	515998	515.998	939.116	50.3653	44516.5	44.5165	81.0201	514182	514.182	935.812	50.3653	39137.5	39.1375	71.2302
222.903	16766	4.13271	234641	234.641	427.047	53.9363	46110.2	46.1102	83.9205	237359	237.359	431.993	53.9363	40808.4	40.8084	74.2714
311.981	17835	6.19626	517556	517.556	941.952	50.3499	44509.8	44.5098	81.0078	515696	515.696	938.567	50.3499	39130.4	39.1304	71.2174
135.77	5691	2.39172	102580	102.58	186.696	56.7667	47413.1	47.4131	86.2918	100761	100.761	183.385	56.7667	42177.2	42.1772	76.7625
357.672	29337	7.39921	747888	747.888	1361.16	48.3392	43636.7	43.6367	79.4187	741080	741.08	1348.77	48.3392	38216.6	38.2166	69.5541
176.161	12661	3.16952	151186	151.186	275.159	55.5797	46862.3	46.8623	85.2894	151825	151.825	276.321	55.5797	41598.3	41.5983	75.7089
379.196	31210	8.00749	878686	878.686	1599.21	47.3552	43215.5	43.2155	78.6522	872338	872.338	1587.65	47.3552	37776.2	37.7762	68.7527
179.507	10094	3.23612	156077	156.077	284.061	55.4699	46811.7	46.8117	85.1972	156911	156.911	285.577	55.4699	41545.1	41.5451	75.6121
162.755	11285	2.9061	133015	133.015	242.087	56.0046	47058.7	47.0587	85.6469	132843	132.843	241.775	56.0046	41804.7	41.8047	76.0845
189.433	12527	3.43574	171486	171.486	312.104	55.136	46658.1	46.6581	84.9177	172870	172.87	314.623	55.136	41383.7	41.3837	75.3184
217.27	13357	4.01273	222685	222.685	405.286	54.1452	46205.1	46.2051	84.0933	225255	225.255	409.964	54.1452	40908.1	40.9081	74.4528
282.189	25191	5.46855	400800	400.8	729.455	51.6021	45062.3	45.0623	82.0133	402026	402.026	731.687	51.6021	39709.3	39.7093	72.2709
213.645	12787	3.9361	215291	215.291	391.83	54.2783	46265.7	46.2657	84.2036	217747	217.747	396.3	54.2783	40971.7	40.9717	74.5685
162.873	9643	2.9084	133165	133.165	242.361	56.0009	47057	47.057	85.6438	133001	133.001	242.062	56.0009	41802.9	41.8029	76.0813
191.948	10104	3.48682	175612	175.612	319.614	55.0496	46618.4	46.6184	84.8455	177128	177.128	322.373	55.0496	41342.1	41.3421	75.2426
143.137	7820	2.53012	110148	110.148	200.469	56.5733	47322.9	47.3229	86.1277	108770	108.77	197.962	56.5733	42082.4	42.0824	76.59
127.166	7760	2.23195	94378	94.378	171.768	56.9752	47510.5	47.5105	86.4691	92059.6	92.0596	167.549	56.9752	42279.6	42.2796	76.9489
253.798	15079	4.81147	311329	311.329	566.619	52.7485	45573.9	45.5739	82.9446	314044	314.044	571.56	52.7485	40245.8	40.2458	73.2473
273.491	24591	5.26365	371264	371.264	675.7	51.9584	45220.7	45.2207	82.3016	373110	373.11	679.06	51.9584	39875.3	39.8753	72.5731
132.139	8690	2.32405	99037.9	99.0379	180.249	56.8571	47455.3	47.4553	86.3686	97005.5	97.0055	176.55	56.8571	42221.6	42.2216	76.8433
141.068	8221	2.4911	107970	107.97	196.505	56.6289	47348.8	47.3488	86.1748	106467	106.467	193.77	56.6289	42109.6	42.1096	76.6395
216.262	20516	3.99137	220605	220.605	401.502	54.1824	46222	46.222	84.1241	223146	223.146	406.125	54.1824	40925.8	40.9258	74.485
323.13	23724	6.47956	567853	567.853	1033.49	49.8692	44299.5	44.2995	80.6251	564594	564.594	1027.56	49.8692	38910.2	38.9102	70.8165
282.852	18789	5.48431	403132	403.132	733.7	51.5748	45050.1	45.0501	81.9912	404305	404.305	735.835	51.5748	39696.5	39.6965	72.2477
133.482	8774	2.34904	100334	100.334	182.608	56.8241	47439.9	47.4399	86.3405	98380.2	98.3802	179.052	56.8241	42205.3	42.2053	76.8137
122.407	9570	2.14443	90118.2	90.1182	164.015	57.0813	47560.1	47.5601	86.5594	87533.4	87.5334	159.311	57.0813	42331.8	42.3318	77.0439
307.4	19364	6.08164	497960	497.96	906.288	50.5456	44595.7	44.5957	81.1641	496653	496.653	903.908	50.5456	39220.4	39.2204	71.3811
264.021	22213	5.04422	341280	341.28	621.129	52.3413	45391.5	45.3915	82.6126	343635	343.635	625.416	52.3413	40054.5	40.0545	72.8992
216.23	20207	3.9907	220540	220.54	401.382	54.1835	46222.5	46.2225	84.125	223079	223.079	406.003	54.1835	40926.4	40.9264	74.486
280.402	26288	5.42619	394571	394.571	718.12	51.6757	45094.9	45.0949	82.0728	395937	395.937	720.605	51.6757	39743.5	39.7435	72.3332
339.158	23371	6.89811	646791	646.791	1177.16	49.1668	43994	43.994	80.069	641577	641.577	1167.67	49.1668	38590.4	38.5904	70.2345
158.974	11523	2.83278	128280	128.28	233.469	56.1195	47112	47.112	85.7438	127875	127.875	232.733	56.1195	41860.7	41.8607	76.1865
148.488	8562	2.63158	115979	115.979	211.082	56.4254	47254.1	47.2541	86.0024	114928	114.928	209.169	56.4254	42010	42.01	76.4582
196.373	14610	3.57718	183101	183.101	333.243	54.8961	46548	46.548	84.7173	184838	184.838	336.406	54.8961	41268.1	41.2681	75.1079
265.667	17006	5.08209	346333	346.333	630.326	52.2752	45362	45.362	82.5588	348613	348.613	634.475	52.2752	40023.5	40.0235	72.8427
133.335	8049	2.3463	100191	100.191	182.348	56.8277	47441.6	47.4416	86.3436	98228.9	98.2289	178.777	56.8277	42207.1	42.2071	76.817
102.771	4909	1.78949	74436.1	74.4361	135.474	57.4303	47723.8	47.7238	86.8573	70843.5	70.8435	128.935	57.4303	42503.9	42.5039	77.3571
115.735	4744	2.02272	84459.3	84.4593	153.716	57.2174	47623.9	47.6239	86.6754	81514.5	81.5145	148.356	57.2174	42398.8	42.3988	77.1659
265.034	10789	5.06751	344382	344.382	626.775	52.3006	45373.3	45.3733	82.5795	346691	346.691	630.978	52.3006	40035.4	40.0354	72.8644
322.827	22474	6.47177	566437	566.437	1030.91	49.8823	44305.2	44.3052	80.6355	563216	563.216	1025.05	49.8823	38916.2	38.9162	70.8275
310.404	23102	6.15669	510741	510.741	929.548	50.4174	44539.4	44.5394	81.0617	509073	509.073	926.513	50.4174	39161.4	39.1614	71.2738
170.019	10748	3.04816	142585	142.585	259.505	55.7775	46953.7	46.9537	85.4557	142857	142.857	259.999	55.7775	41694.3	41.6943	75.8836
255.372	20175	4.84703	315783	315.783	574.724	52.6862	45546	45.546	82.8937	318455	318.455	579.588	52.6862	40216.5	40.2165	73.194
359.765	24523	7.45711	759987	759.987	1383.18	48.2446	43596	43.596	79.3447	753085	753.085	1370.62	48.2446	38174	38.174	69.4767
248.832	14310	4.69992	297645	297.645	541.714	52.9439	45661.7	45.6617	83.1043	300465	300.465	546.847	52.9439	40337.9	40.3379	73.4149
326.634	20798	6.5699	584436	584.436	1063.67	49.7167	44233	44.233	80.5041	580734	580.734	1056.94	49.7167	38840.6	38.8406	70.6899
243.18	16501	4.57412	282730	282.73	514.569	53.1643	45760.9	45.7609	83.2849	285618	285.618	519.825	53.1643	40441.9	40.4419	73.6043
361.803	14467	7.51374	771897	771.897	1404.85	48.1522	43556.3	43.5563	79.2725	764928	764.928	1392.17	48.1522	38132.5	38.1325	69.4012
184.925	9398	3.34469	164317	164.317	299.058	55.2891	46728.4	46.7284	85.0457	165457	165.457	301.132	55.2891	41457.6	41.4576	75.4529
154.492	12463	2.74639	122876	122.876	223.634	56.2527	47173.8	47.1738	85.8563	122195	122.195	222.395	56.2527	41925.6	41.9256	76.3047
178.789	9590	3.2218	155015	155.015	282.128	55.4936	46822.6	46.8226	85.2171	155807	155.807	283.569	55.4936	41556.6	41.5566	75.633
84.451	3137	1.46696	62227	62.227	113.253	57.5687	47788.8	47.7888	86.9756	57851.7	57.8517	105.29	57.5687	42572.3	42.5723	77.4816
205.096	11597	3.75719	198749	198.749	361.723	54.5875	46406.8	46.4068	84.4603	200883	200.883	365.606	54.5875	41119.8	41.1198	74.8381
96.625	5722	1.68038	70099.5	70.0995	127.581	57.5018	47757.4	47.7574	86.9184	66226.2	66.2262	120.532	57.5018	42539.2	42.5392	77.4214
166.008	7820	2.96953	137222	137.222	249.744	55.9039	47012.1	47.0121	85.562	137250	137.25	249.795	55.9039	41755.7	41.7557	75.9954
104.045	8644	1.81222	75367.2	75.3672	137.168	57.4129	47715.6	47.7156	86.8424	71835.1	71.8351	130.74	57.4129	42495.3	42.4953	77.3415
127.332	8417	2.23502	94530.1	94.5301	172.045	56.9714	47508.7	47.5087	86.4658	92221.1	92.2211	167.842	56.9714	42277.7	42.2777	76.9454
323.836	24302	6.49771	571164	571.164	1039.52	49.8385	44286.1	44.2861	80.6007	567816	567.816	1033.43	49.8385	38896.2	38.8962	70.791
319.755	21189	6.39313	552233	552.233	1005.06	50.0154	44363.3	44.3633	80.7413	549402	549.402	999.912	50.0154	38977.1	38.9771	70.9382
242.802	15877	4.56575	281757	281.757	512.799	53.1789	45767.5	45.7675	83.2969	284648	284.648	518.059	53.1789	40448.9	40.4489	73.617
217.437	15370	4.01627	223031	223.031	405.916	54.1391	46202.3	46.2023	84.0882	225606	225.606	410.603	54.1391	40905.2	40.9052	74.4474
204.393	18807	3.74259	197443	197.443	359.346	54.6127	46418.3	46.4183	84.4812	199547	199.547	363.175	54.6127	41131.9	41.1319	74.8601
282.84	22602	5.48402	403090	403.09	733.623	51.5753	45050.3	45.0503	81.9916	404264	404.264	735.76	51.5753	39696.8	39.6968	72.2481
265.256	19549	5.07262	345065	345.065	628.019	52.2917	45369.4	45.3694	82.5722	347364	347.364	632.203	52.2917	40031.2	40.0312	72.8568
311.446	21821	6.18282	515236	515.236	937.729	50.3728	44519.8	44.5198	81.0261	513442	513.442	934.464	50.3728	39140.9	39.1409	71.2365
146.974	12839	2.60279	114300	114.3	208.025	56.4678	47273.8	47.2738	86.0383	113156	113.156	205.944	56.4678	42030.8	42.0308	76.496
193.846	10820	3.5255	178788	178.788	325.394	54.984	46588.3	46.5883	84.7907	180401	180.401	328.329	54.984	41310.5	41.3105	75.185
202.129	10186	3.69568	193291	193.291	351.79	54.6933	46455.1	46.4551	84.5483	195297	195.297	355.44	54.6933	41170.6	41.1706	74.9305
398.375	25116	8.57491	1.00665e+06	1006.65	1832.1	46.4582	42835.1	42.8351	77.96	1.00472e+06	1004.72	1828.59	46.4582	37378.8	37.3788	68.0294
95.846	6313	1.66662	69567.8	69.5678	126.613	57.5093	47760.9	47.7609	86.9248	65660.2	65.6602	119.502	57.5093	42542.9	42.5429	77.4281
401.03	31862	8.65547	1.02516e+06	1025.16	1865.78	46.3325	42782.1	42.7821	77.8634	1.02426e+06	1024.26	1864.16	46.3325	37323.4	37.3234	67.9285
150.119	6793	2.66267	117815	117.815	214.423	56.3791	47232.6	47.2326	85.9632	116864	116.864	212.693	56.3791	41987.4	41.9874	76.4171
70.702	2987	1.23012	54375.6	54.3756	98.9636	57.4757	47745.1	47.7451	86.8961	49523.6	49.5236	90.1329	57.4757	42526.3	42.5263	77.3979
72.579	2384	1.2622	55387.2	55.3872	100.805	57.5021	47757.5	47.7575	86.9187	50594.5	50.5945	92.082	57.5021	42539.4	42.5394	77.4217
168.799	10590	3.02419	140933	140.933	256.498	55.8162	46971.5	46.9715	85.4882	141131	141.131	256.858	55.8162	41713.1	41.7131	75.9178
280.344	20919	5.42482	394371	394.371	717.754	51.6781	45096	45.096	82.0747	395740	395.74	720.247	51.6781	39744.6	39.7446	72.3352
179.931	11479	3.24458	156708	156.708	285.208	55.4558	46805.2	46.8052	85.1855	157566	157.566	286.769	55.4558	41538.3	41.5383	75.5997
94.397	6071	1.64106	68589.3	68.5893	124.833	57.5221	47766.9	47.7669	86.9358	64618.7	64.6187	117.606	57.5221	42549.3	42.5493	77.4397
53.873	2138	0.946048	46081.4	46.0814	83.8682	56.9453	47496.5	47.4965	86.4437	40778.3	40.7783	74.2164	56.9453	42264.9	42.2649	76.9222
143.347	11053	2.53408	110371	110.371	200.875	56.5676	47320.3	47.3203	86.1229	109006	109.006	198.391	56.5676	42079.6	42.0796	76.5849
114.48	5317	1.99996	83434.1	83.4341	151.85	57.2412	47635	47.635	86.6957	80423.6	80.4236	146.371	57.2412	42410.6	42.4106	77.1872
130.225	7673	2.28853	97218.6	97.2186	176.938	56.9034	47476.9	47.4769	86.408	95075.3	95.0753	173.037	56.9034	42244.3	42.2443	76.8846
505.626	44010	12.3147	1.84174e+06	1841.74	3351.97	41.0586	40614.2	40.6142	73.9178	2.07427e+06	2074.27	3775.17	41.0586	35063.2	35.0632	63.8151
312.145	28244	6.20038	518269	518.269	943.249	50.3429	44506.7	44.5067	81.0022	516389	516.389	939.828	50.3429	39127.2	39.1272	71.2115
270.13	20543	5.18534	360368	360.368	655.87	52.0949	45281.5	45.2815	82.4124	362415	362.415	659.595	52.0949	39939.1	39.9391	72.6892
296.15	19269	5.80444	452413	452.413	823.392	51.0213	44805.2	44.8052	81.5454	452358	452.358	823.292	51.0213	39439.8	39.4398	71.7805
601.598	36529	16.9422	2.51096e+06	2510.96	4569.95	35.5089	38449.9	38.4499	69.9788	3.6456e+06	3645.6	6635	35.5089	32816.4	32.8164	59.7258
433.485	34596	9.68348	1.26466e+06	1264.66	2301.68	44.7654	42126.3	42.1263	76.6698	1.28903e+06	1289.03	2346.03	44.7654	36638.7	36.6387	66.6825
304.054	21709	5.99857	484034	484.034	880.943	50.6878	44658.2	44.6582	81.2779	483117	483.117	879.272	50.6878	39285.9	39.2859	71.5003
288.919	22787	5.62937	425018	425.018	773.533	51.3235	44938.7	44.9387	81.7885	425669	425.669	774.718	51.3235	39579.8	39.5798	72.0353
373.964	29235	7.85696	845607	845.607	1539.01	47.5965	43318.4	43.3184	78.8396	838808	838.808	1526.63	47.5965	37883.8	37.8838	68.9485
262.805	20690	5.01631	337588	337.588	614.41	52.3901	45413.4	45.4134	82.6523	339997	339.997	618.794	52.3901	40077.4	40.0774	72.9408
302.555	17801	5.96152	477901	477.901	869.779	50.7513	44686.1	44.6861	81.3288	477153	477.153	868.418	50.7513	39315.1	39.3151	71.5536
234.024	18165	4.37292	260000	260	473.2	53.5166	45920	45.92	83.5744	262886	262.886	478.453	53.5166	40608.8	40.6088	73.9081
306.022	27383	6.04736	492186	492.186	895.778	50.6042	44621.4	44.6214	81.211	491040	491.04	893.693	50.6042	39247.4	39.2474	71.4302
194.144	15263	3.53158	179292	179.292	326.311	54.9737	46583.5	46.5835	84.7821	180919	180.919	329.273	54.9737	41305.5	41.3055	75.176
114.211	5833	1.99509	83216	83.216	151.453	57.2462	47637.4	47.6374	86.7	80191.4	80.1914	145.948	57.2462	42413	42.413	77.1917
289.281	28597	5.63808	426356	426.356	775.967	51.3084	44932.1	44.9321	81.7764	426973	426.973	777.091	51.3084	39572.8	39.5728	72.0225
253.115	18371	4.79607	309414	309.414	563.134	52.7755	45586	45.586	82.9666	312146	312.146	568.106	52.7755	40258.5	40.2585	73.2704
375.315	29961	7.89566	854071	854.071	1554.41	47.5343	43291.9	43.2919	78.7913	847363	847.363	1542.2	47.5343	37856.1	37.8561	68.898
193.181	10404	3.51193	177669	177.669	323.358	55.0071	46598.9	46.5989	84.8099	179248	179.248	326.232	55.0071	41321.6	41.3216	75.2052
223.158	14873	4.13816	235196	235.196	428.058	53.9268	46105.9	46.1059	83.9126	237920	237.92	433.014	53.9268	40803.9	40.8039	74.2631
107.516	5694	1.87437	77962.3	77.9623	141.891	57.3613	47691.4	47.6914	86.7983	74598.4	74.5984	135.769	57.3613	42469.8	42.4698	77.2951
156.546	11262	2.78591	125325	125.325	228.091	56.1921	47145.7	47.1457	85.8051	124770	124.77	227.082	56.1921	41896.1	41.8961	76.2509
170.04	10646	3.04858	142614	142.614	259.557	55.7769	46953.4	46.9534	85.4551	142887	142.887	260.054	55.7769	41694	41.694	75.883
373.305	23906	7.83812	841498	841.498	1531.53	47.6268	43331.4	43.3314	78.8631	834660	834.66	1519.08	47.6268	37897.3	37.8973	68.9732
211.534	15510	3.89169	211091	211.091	384.186	54.3553	46300.8	46.3008	84.2674	213475	213.475	388.524	54.3553	41008.5	41.0085	74.6355
273.17	18940	5.25615	370211	370.211	673.784	51.9715	45226.5	45.2265	82.3122	372077	372.077	677.18	51.9715	39881.4	39.8814	72.5842
120.446	5629	2.10854	88417.8	88.4178	160.92	57.1229	47579.6	47.5796	86.5949	85725.5	85.7255	156.02	57.1229	42352.3	42.3523	77.0812
142.303	9425	2.51437	109265	109.265	198.862	56.5958	47333.4	47.3334	86.1468	107837	107.837	196.263	56.5958	42093.4	42.0934	76.61
279.927	21954	5.41495	392930	392.93	715.132	51.6952	45103.6	45.1036	82.0885	394331	394.331	717.682	51.6952	39752.6	39.7526	72.3497
253.254	15608	4.79921	309803	309.803	563.842	52.77	45583.6	45.5836	82.9621	312532	312.532	568.808	52.77	40255.9	40.2559	73.2657
271.797	17939	5.22412	365737	365.737	665.641	52.0273	45251.4	45.2514	82.3575	367687	367.687	669.189	52.0273	39907.5	39.9075	72.6317
109.869	6718	1.91666	79770.8	79.7708	145.183	57.323	47673.4	47.6734	86.7656	76524	76.524	139.274	57.323	42450.9	42.4509	77.2607
102.515	5425	1.78493	74250.3	74.2503	135.136	57.4337	47725.4	47.7254	86.8602	70645.7	70.6457	128.575	57.4337	42505.6	42.5056	77.3602
303.141	22391	5.97599	480291	480.291	874.129	50.7265	44675.2	44.6752	81.3089	479477	479.477	872.648	50.7265	39303.7	39.3037	71.5327
111.53	7273	1.94661	81072	81.072	147.551	57.2946	47660.1	47.6601	86.7413	77909.3	77.9093	141.795	57.2946	42436.9	42.4369	77.2352
210.741	11955	3.87505	209533	209.533	381.351	54.3841	46313.9	46.3139	84.2913	211888	211.888	385.636	54.3841	41022.3	41.0223	74.6606
120.618	4412	2.11168	88565.7	88.5657	161.19	57.1193	47577.9	47.5779	86.5918	85882.7	85.8827	156.307	57.1193	42350.5	42.3505	77.078
265.544	18462	5.07926	345953	345.953	629.635	52.2801	45364.2	45.3642	82.5628	348239	348.239	633.794	52.2801	40025.8	40.0258	72.8469
222.476	17380	4.12357	233715	233.715	425.361	53.9523	46117.4	46.1174	83.9337	236422	236.422	430.289	53.9523	40816	40.816	74.2852
274.079	17113	5.2774	373199	373.199	679.223	51.9345	45210	45.21	82.2822	375008	375.008	682.514	51.9345	39864.2	39.8642	72.5528
272.422	20280	5.23869	367768	367.768	669.337	52.0019	45240.1	45.2401	82.3369	369680	369.68	672.817	52.0019	39895.6	39.8956	72.6101
455.213	34665	10.4208	1.43555e+06	1435.55	2612.7	43.6831	41679.1	41.6791	75.856	1.49507e+06	1495.07	2721.03	43.6831	36172.4	36.1724	65.8337
245.188	13056	4.61867	287950	287.95	524.069	53.0862	45725.8	45.7258	83.2209	290820	290.82	529.293	53.0862	40405.1	40.4051	73.5372
341.051	25547	6.94846	656638	656.638	1195.08	49.083	43957.6	43.9576	80.0029	651215	651.215	1185.21	49.083	38552.4	38.5524	70.1653
241.626	15705	4.53975	278750	278.75	507.325	53.2245	45788.1	45.7881	83.3343	281647	281.647	512.597	53.2245	40470.4	40.4704	73.6562
176.128	14163	3.16886	151139	151.139	275.073	55.5808	46862.8	46.8628	85.2903	151775	151.775	276.231	55.5808	41598.8	41.5988	75.7099
280.456	19798	5.42747	394758	394.758	718.46	51.6735	45093.9	45.0939	82.071	396119	396.119	720.937	51.6735	39742.5	39.7425	72.3313
367.341	37155	7.6689	804907	804.907	1464.93	47.9001	43448.2	43.4482	79.0758	797881	797.881	1452.14	47.9001	38019.5	38.0195	69.1955
142.394	9381	2.51609	109361	109.361	199.036	56.5934	47332.3	47.3323	86.1447	107938	107.938	196.447	56.5934	42092.2	42.0922	76.6079
264.786	21069	5.0618	343620	343.62	625.389	52.3106	45377.8	45.3778	82.5876	345941	345.941	629.613	52.3106	40040.1	40.0401	72.8729
89.888	6571	1.56184	65629.7	65.6297	119.446	57.5527	47781.3	47.7813	86.962	61469.5	61.4695	111.875	57.5527	42564.4	42.5644	77.4672
241.7	15511	4.54139	278938	278.938	507.668	53.2216	45786.8	45.7868	83.3319	281835	281.835	512.939	53.2216	40469.1	40.4691	73.6537
259.466	16178	4.93999	327633	327.633	596.292	52.5236	45473.1	45.4731	82.761	330173	330.173	600.914	52.5236	40140	40.14	73.0548
176.397	8987	3.17421	151526	151.526	275.778	55.572	46858.8	46.8588	85.2829	152179	152.179	276.965	55.572	41594.6	41.5946	75.7021
277.305	16845	5.3531	383975	383.975	698.834	51.8027	45151.4	45.1514	82.1755	385566	385.566	701.731	51.8027	39802.7	39.8027	72.4409
96.957	3486	1.68625	70327.3	70.3273	127.996	57.4985	47755.8	47.7558	86.9156	66468.8	66.4688	120.973	57.4985	42537.6	42.5376	77.4185
259.311	16719	4.93646	327177	327.177	595.462	52.5297	45475.8	45.4758	82.766	329722	329.722	600.095	52.5297	40142.9	40.1429	73.0601
352.726	22118	7.26342	719836	719.836	1310.1	48.562	43732.6	43.7326	79.5933	713335	713.335	1298.27	48.562	38316.9	38.3169	69.7367
188.117	12671	3.40909	169363	169.363	308.241	55.1809	46678.7	46.6787	84.9552	170677	170.677	310.632	55.1809	41405.4	41.4054	75.3579
307.73	17097	6.08986	499351	499.351	908.819	50.5315	44589.5	44.5895	81.1529	498005	498.005	906.369	50.5315	39213.9	39.2139	71.3693
267.412	25388	5.12236	351763	351.763	640.208	52.2048	45330.6	45.3306	82.5016	353955	353.955	644.199	52.2048	39990.5	39.9905	72.7828
296.123	22304	5.80378	452308	452.308	823.201	51.0225	44805.7	44.8057	81.5463	452256	452.256	823.106	51.0225	39440.4	39.4404	71.7815
234.475	14733	4.38276	261080	261.08	475.165	53.4994	45912.2	45.9122	83.5602	263969	263.969	480.423	53.4994	40600.7	40.6007	73.8932
135.153	7499	2.3802	101970	101.97	185.585	56.7823	47420.4	47.4204	86.305	100114	100.114	182.208	56.7823	42184.8	42.1848	76.7764
163.229	10398	2.91532	133620	133.62	243.188	55.99	47052	47.052	85.6346	133478	133.478	242.93	55.99	41797.6	41.7976	76.0716
205.844	18265	3.77275	200148	200.148	364.269	54.5607	46394.5	46.3945	84.4381	202312	202.312	368.208	54.5607	41107	41.107	74.8147
94.205	3340	1.63767	68460.7	68.4607	124.598	57.5237	47767.6	47.7676	86.9371	64481.8	64.4818	117.357	57.5237	42550.1	42.5501	77.4411
320.917	22757	6.42282	557572	557.572	1014.78	49.9651	44341.4	44.3414	80.7013	554594	554.594	1009.36	49.9651	38954.1	38.9541	70.8964
418.881	30052	9.21069	1.15407e+06	1154.07	2100.41	45.4777	42423.1	42.4231	77.2101	1.16381e+06	1163.81	2118.14	45.4777	36948.5	36.9485	67.2463
265.532	11768	5.07898	345916	345.916	629.568	52.2806	45364.4	45.3644	82.5632	348202	348.202	633.728	52.2806	40026	40.026	72.8474
183.588	9106	3.31782	162247	162.247	295.289	55.334	46749.1	46.7491	85.0833	163312	163.312	297.228	55.334	41479.4	41.4794	75.4924
331.143	27748	6.6871	606328	606.328	1103.52	49.5197	44147.2	44.1472	80.3479	602063	602.063	1095.76	49.5197	38750.8	38.7508	70.5264
94.416	6765	1.64139	68602	68.602	124.856	57.5219	47766.8	47.7668	86.9356	64632.2	64.6322	117.631	57.5219	42549.2	42.5492	77.4395
198.579	18035	3.62247	186945	186.945	340.24	54.8187	46512.5	46.5125	84.6528	188788	188.788	343.595	54.8187	41230.9	41.2309	75.0402
251.148	18466	4.75182	303958	303.958	553.204	52.853	45620.8	45.6208	83.0299	306735	306.735	558.258	52.853	40295	40.295	73.3369
228.344	15952	4.24967	246750	246.75	449.085	53.7322	46017.6	46.0176	83.752	249571	249.571	454.22	53.7322	40711.2	40.7112	74.0944
79.389	3296	1.37925	59214.8	59.2148	107.771	57.5594	47784.5	47.7845	86.9677	54652.7	54.6527	99.4679	57.5594	42567.7	42.5677	77.4733
230.371	15528	4.29352	251406	251.406	457.559	53.6555	45982.8	45.9828	83.6888	254256	254.256	462.745	53.6555	40674.8	40.6748	74.0281
259.284	17692	4.93585	327098	327.098	595.318	52.5308	45476.3	45.4763	82.7669	329644	329.644	599.952	52.5308	40143.4	40.1434	73.061
321.898	29268	6.44794	562111	562.111	1023.04	49.9226	44322.8	44.3228	80.6675	559009	559.009	1017.4	49.9226	38934.6	38.9346	70.861
212.336	8411	3.90855	212678	212.678	387.073	54.3261	46287.5	46.2875	84.2432	215089	215.089	391.463	54.3261	40994.6	40.9946	74.6101
83.921	4765	1.45775	61904.7	61.9047	112.667	57.5689	47788.9	47.7889	86.9758	57509.2	57.5092	104.667	57.5689	42572.4	42.5724	77.4818
400.626	32320	8.64318	1.02233e+06	1022.33	1860.64	46.3517	42790.2	42.7902	77.8781	1.02127e+06	1021.27	1858.71	46.3517	37331.8	37.3318	67.9439
331.182	27665	6.68812	606521	606.521	1103.87	49.518	44146.5	44.1465	80.3465	602251	602.251	1096.1	49.518	38750	38.75	70.525
246.286	17378	4.6431	290841	290.841	529.331	53.0434	45706.5	45.7065	83.1858	293698	293.698	534.531	53.0434	40384.8	40.3848	73.5004
136.713	10443	2.40935	103520	103.52	188.406	56.7426	47401.9	47.4019	86.2714	101757	101.757	185.197	56.7426	42165.4	42.1654	76.741
133.772	7871	2.35444	100616	100.616	183.121	56.8169	47436.5	47.4365	86.3344	98679.2	98.6792	179.596	56.8169	42201.8	42.2018	76.8073
334.264	21824	6.76886	621848	621.848	1131.76	49.3826	44087.6	44.0876	80.2395	617203	617.203	1123.31	49.3826	38688.4	38.6884	70.4129
372.89	29558	7.82628	838918	838.918	1526.83	47.6459	43339.5	43.3395	78.8779	832057	832.057	1514.34	47.6459	37905.9	37.9059	68.9887
222.567	13759	4.12552	233912	233.912	425.72	53.9489	46115.9	46.1159	83.9309	236622	236.622	430.651	53.9489	40814.4	40.8144	74.2822
218.39	18815	4.03649	225016	225.016	409.529	54.1039	46186.3	46.1863	84.0591	227619	227.619	414.266	54.1039	40888.4	40.8884	74.4168
250.604	17952	4.73961	302465	302.465	550.486	52.8744	45630.5	45.6305	83.0474	305252	305.252	555.559	52.8744	40305.1	40.3051	73.3552
201.585	14920	3.68443	192306	192.306	349.996	54.7126	46464	46.464	84.5644	194287	194.287	353.603	54.7126	41179.9	41.1799	74.9474
164.795	12141	2.94584	135639	135.639	246.862	55.9416	47029.6	47.0296	85.5938	135592	135.592	246.778	55.9416	41774.1	41.7741	76.0288
170.99	10905	3.06727	143913	143.913	261.922	55.7466	46939.4	46.9394	85.4296	144243	144.243	262.523	55.7466	41679.3	41.6793	75.8563
165.193	13985	2.95361	136156	136.156	247.804	55.9292	47023.8	47.0238	85.5834	136134	136.134	247.765	55.9292	41768	41.768	76.0178
340.748	23792	6.94039	655055	655.055	1192.2	49.0964	43963.5	43.9635	80.0135	649665	649.665	1182.39	49.0964	38558.5	38.5585	70.1764
67.936	3710	1.183	52918	52.918	96.3108	57.4271	47722.3	47.7223	86.8545	47981.8	47.9818	87.3269	57.4271	42502.3	42.5023	77.3542
109.028	5535	1.90153	79119.7	79.1197	143.998	57.337	47680	47.68	86.7775	75830.8	75.8308	138.012	57.337	42457.8	42.4578	77.2732
341.043	20982	6.94825	656596	656.596	1195.01	49.0833	43957.8	43.9578	80.0032	651174	651.174	1185.14	49.0833	38552.5	38.5525	70.1656
279.11	29719	5.39564	390120	390.12	710.019	51.7288	45118.5	45.1185	82.1157	391582	391.582	712.68	51.7288	39768.2	39.7682	72.3781
218.585	19093	4.04063	225424	225.424	410.272	54.0967	46183	46.183	84.0531	228032	228.032	415.019	54.0967	40884.9	40.8849	74.4106
385.644	26448	8.19547	920555	920.555	1675.41	47.0557	43088.2	43.0882	78.4205	915156	915.156	1665.58	47.0557	37643.1	37.6431	68.5105
329.235	21858	6.63738	596989	596.989	1086.52	49.6032	44183.5	44.1835	80.414	592960	592.96	1079.19	49.6032	38788.8	38.7888	70.5956
321.548	21843	6.43897	560488	560.488	1020.09	49.9378	44329.4	44.3294	80.6796	557430	557.43	1014.52	49.9378	38941.6	38.9416	70.8736
336.72	21260	6.83356	634273	634.273	1154.38	49.2745	44040.7	44.0407	80.154	629338	629.338	1145.39	49.2745	38639.3	38.6393	70.3235
221.648	11790	4.10588	231927	231.927	422.108	53.9831	46131.4	46.1314	83.9592	234615	234.615	427	53.9831	40830.7	40.8307	74.3119
184.217	10886	3.33045	163218	163.218	297.056	55.3129	46739.4	46.7394	85.0657	164318	164.318	299.059	55.3129	41469.2	41.4692	75.4739
411.31	29237	8.97227	1.09848e+06	1098.48	1999.23	45.8424	42575.9	42.5759	77.4881	1.10287e+06	1102.87	2007.22	45.8424	37108	37.108	67.5366
314.482	17197	6.25927	528515	528.515	961.898	50.2426	44462.8	44.4628	80.9223	526347	526.347	957.952	50.2426	39081.2	39.0812	71.1278
285.197	23328	5.54018	411474	411.474	748.883	51.4779	45007.2	45.0072	81.913	412454	412.454	750.665	51.4779	39651.5	39.6515	72.1657
447.653	45564	10.1594	1.3754e+06	1375.4	2503.24	44.0628	41835.4	41.8354	76.1405	1.4206e+06	1420.6	2585.5	44.0628	36335.4	36.3354	66.1304
237.211	17278	4.4426	267716	267.716	487.244	53.3947	45864.9	45.8649	83.4741	270618	270.618	492.525	53.3947	40551	40.551	73.8028
270.438	19030	5.1925	361355	361.355	657.666	52.0825	45276	45.276	82.4022	363384	363.384	661.359	52.0825	39933.3	39.9333	72.6786
414.422	28838	9.06973	1.12117e+06	1121.17	2040.53	45.6929	42513.2	42.5132	77.374	1.1276e+06	1127.6	2052.23	45.6929	37042.5	37.0425	67.4174
333.08	16241	6.73778	615925	615.925	1120.98	49.4347	44110.2	44.1102	80.2807	611423	611.423	1112.79	49.4347	38712.1	38.7121	70.456
277.871	18066	5.36642	385893	385.893	702.325	51.7796	45141.1	45.1411	82.1568	387444	387.444	705.149	51.7796	39791.9	39.7919	72.4212
183.281	12684	3.31165	161775	161.775	294.43	55.3443	46753.8	46.7538	85.092	162823	162.823	296.337	55.3443	41484.3	41.4843	75.5015
407.288	37115	8.84739	1.06948e+06	1069.48	1946.46	46.0348	42656.7	42.6567	77.6353	1.07155e+06	1071.55	1950.23	46.0348	37192.4	37.1924	67.6902
229.128	16185	4.26661	248541	248.541	452.345	53.7026	46004.1	46.0041	83.7275	251374	251.374	457.501	53.7026	40697.2	40.6972	74.0688
341.481	26901	6.95992	658891	658.891	1199.18	49.0639	43949.4	43.9494	79.9879	653421	653.421	1189.23	49.0639	38543.7	38.5437	70.1496
295.166	15552	5.78047	448600	448.6	816.452	51.0626	44823.4	44.8234	81.5786	448646	448.646	816.536	51.0626	39458.9	39.4589	71.8153
257.977	22241	4.90611	323278	323.278	588.366	52.5828	45499.6	45.4996	82.8094	325869	325.869	593.082	52.5828	40167.9	40.1679	73.1055
278.866	22509	5.38988	389285	389.285	708.498	51.7388	45122.9	45.1229	82.1238	390764	390.764	711.191	51.7388	39772.9	39.7729	72.3866
497.07	45090	11.973	1.77335e+06	1773.35	3227.5	41.5161	40797.8	40.7978	74.252	1.96526e+06	1965.26	3576.78	41.5161	35254.3	35.2543	64.1629
251.687	19788	4.76393	305445	305.445	555.91	52.8318	45611.3	45.6113	83.0126	308210	308.21	560.942	52.8318	40285	40.285	73.3187
272.461	15164	5.2396	367895	367.895	669.568	52.0003	45239.4	45.2394	82.3356	369804	369.804	673.044	52.0003	39894.9	39.8949	72.6087
284.896	20652	5.533	410395	410.395	746.92	51.4904	45012.7	45.0127	81.9231	411400	411.4	748.748	51.4904	39657.3	39.6573	72.1763
299.951	21292	5.89743	467398	467.398	850.665	50.8613	44734.6	44.7346	81.417	466939	466.939	849.829	50.8613	39365.9	39.3659	71.646
322.632	25971	6.46677	565527	565.527	1029.26	49.8908	44308.9	44.3089	80.6422	562331	562.331	1023.44	49.8908	38920.1	38.9201	70.8345
215.731	12880	3.98014	219517	219.517	399.522	54.2019	46230.9	46.2309	84.1402	222041	222.041	404.115	54.2019	40935.2	40.9352	74.502
326.358	21373	6.56276	583117	583.117	1061.27	49.7288	44238.2	44.2382	80.5136	579449	579.449	1054.6	49.7288	38846.1	38.8461	70.6999
179.265	13009	3.23129	155719	155.719	283.408	55.4779	46815.3	46.8153	85.2039	156538	156.538	284.899	55.4779	41549	41.549	75.6191
360.672	21550	7.48228	765272	765.272	1392.79	48.2035	43578.3	43.5783	79.3125	758337	758.337	1380.17	48.2035	38155.6	38.1556	69.4431
320.31	20565	6.40731	554778	554.778	1009.7	49.9914	44352.9	44.3529	80.7222	551877	551.877	1004.42	49.9914	38966.1	38.9661	70.9182
261.864	19690	4.99476	334756	334.756	609.255	52.4278	45430.2	45.4302	82.683	337203	337.203	613.71	52.4278	40095	40.095	72.973
305.897	21802	6.04426	491665	491.665	894.83	50.6095	44623.8	44.6238	81.2153	490534	490.534	892.772	50.6095	39249.8	39.2498	71.4347
160.914	10848	2.87035	130689	130.689	237.853	56.0608	47084.8	47.0848	85.6943	130404	130.404	237.335	56.0608	41832.1	41.8321	76.1344
204.294	19941	3.74054	197260	197.26	359.013	54.6162	46419.9	46.4199	84.4842	199359	199.359	362.834	54.6162	41133.6	41.1336	74.8631
166.33	11460	2.97582	137645	137.645	250.515	55.8938	47007.4	47.0074	85.5535	137693	137.693	250.602	55.8938	41750.8	41.7508	75.9865
136.654	10684	2.40825	103461	103.461	188.299	56.7441	47402.6	47.4026	86.2727	101694	101.694	185.083	56.7441	42166.1	42.1661	76.7424
133.802	6716	2.355	100645	100.645	183.174	56.8161	47436.1	47.4361	86.3338	98710.2	98.7102	179.653	56.8161	42201.4	42.2014	76.8066
449.129	56755	10.21	1.3871e+06	1387.1	2524.52	43.989	41805	41.805	76.0851	1.4349e+06	1434.9	2611.53	43.989	36303.6	36.3036	66.0726
103.202	3306	1.79718	74749.8	74.7498	136.045	57.4245	47721.1	47.7211	86.8523	71177.6	71.1776	129.543	57.4245	42501	42.501	77.3519
93.292	3693	1.6216	67852.1	67.8521	123.491	57.5309	47771.1	47.7711	86.9433	63834.1	63.8341	116.178	57.5309	42553.6	42.5536	77.4476
199.038	9396	3.63191	187754	187.754	341.713	54.8026	46505.1	46.5051	84.6394	189619	189.619	345.107	54.8026	41223.1	41.2231	75.0261
55.815	1708	0.978509	46971	46.971	85.4872	57.0408	47541.2	47.5412	86.525	41712.5	41.7125	75.9168	57.0408	42311.9	42.3119	77.0076
107.508	4993	1.87422	77956.2	77.9562	141.88	57.3614	47691.4	47.6914	86.7984	74591.9	74.5919	135.757	57.3614	42469.9	42.4699	77.2952
127.118	5773	2.23107	94334.1	94.3341	171.688	56.9763	47511	47.511	86.47	92013	92.013	167.464	56.9763	42280.1	42.2801	76.9499
120.865	5307	2.1162	88778.5	88.7785	161.577	57.1142	47575.5	47.5755	86.5874	86109	86.109	156.718	57.1142	42348	42.348	77.0733
287.654	18648	5.59899	420373	420.373	765.079	51.3761	44962	44.962	81.8309	421138	421.138	766.472	51.3761	39604.2	39.6042	72.0797
188.567	14714	3.4182	170086	170.086	309.557	55.1656	46671.6	46.6716	84.9424	171424	171.424	311.992	55.1656	41398	41.398	75.3444
248.921	13225	4.70191	297885	297.885	542.152	52.9404	45660.1	45.6601	83.1015	300704	300.704	547.282	52.9404	40336.2	40.3362	73.4119
315.938	17927	6.29609	534981	534.981	973.666	50.18	44435.4	44.4354	80.8724	532631	532.631	969.389	50.18	39052.5	39.0525	71.0755
416.683	34970	9.14101	1.1378e+06	1137.8	2070.8	45.5839	42467.6	42.4676	77.291	1.14585e+06	1145.85	2085.44	45.5839	36994.9	36.9949	67.3307
396.419	34166	8.51588	993137	993.137	1807.51	46.5506	42874.2	42.8742	78.031	990515	990.515	1802.74	46.5506	37419.5	37.4195	68.1035
342.456	20531	6.98596	664019	664.019	1208.51	49.0206	43930.7	43.9307	79.9538	658446	658.446	1198.37	49.0206	38524.1	38.5241	70.1139
219.4	19940	4.05796	227138	227.138	413.391	54.0666	46169.3	46.1693	84.0282	229768	229.768	418.178	54.0666	40870.5	40.8705	74.3844
235.125	14429	4.39695	262643	262.643	478.01	53.4746	45901	45.901	83.5398	265536	265.536	483.275	53.4746	40588.9	40.5889	73.8718
297.991	17402	5.84939	459620	459.62	836.509	50.9439	44771	44.771	81.4833	459372	459.372	836.057	50.9439	39404.1	39.4041	71.7154
124.026	7267	2.17414	91546	91.546	166.614	57.046	47543.6	47.5436	86.5294	89051	89.051	162.073	57.046	42314.4	42.3144	77.0123
383.976	30891	8.14658	909609	909.609	1655.49	47.1334	43121.2	43.1212	78.4805	903919	903.919	1645.13	47.1334	37677.6	37.6776	68.5733
209.073	10284	3.84011	206291	206.291	375.45	54.4445	46341.5	46.3415	84.3415	208584	208.584	379.622	54.4445	41051.3	41.0513	74.7133
203.803	14624	3.73035	196353	196.353	357.362	54.6337	46427.9	46.4279	84.4988	198432	198.432	361.146	54.6337	41142	41.142	74.8785
365.104	22738	7.606	791460	791.46	1440.46	48.0021	43491.9	43.4919	79.1553	784433	784.433	1427.67	48.0021	38065.2	38.0652	69.2787
349.269	25895	7.16935	700681	700.681	1275.24	48.717	43799.4	43.7994	79.7149	694453	694.453	1263.9	48.717	38386.8	38.3868	69.864
342.952	23217	6.99922	666639	666.639	1213.28	48.9986	43921.1	43.9211	79.9364	661014	661.014	1203.05	48.9986	38514.2	38.5142	70.0958
389.621	38212	8.3128	946970	946.97	1723.49	46.87	43009.4	43.0094	78.277	942407	942.407	1715.18	46.87	37560.8	37.5608	68.3606
221.247	15484	4.09732	231066	231.066	420.54	53.998	46138.2	46.1382	83.9715	233744	233.744	425.415	53.998	40837.8	40.8378	74.3249
286.935	21845	5.58175	417752	417.752	760.309	51.4059	44975.2	44.9752	81.8549	418581	418.581	761.818	51.4059	39618.1	39.6181	72.1049
223.097	18372	4.13686	235064	235.064	427.816	53.9291	46106.9	46.1069	83.9145	237785	237.785	432.769	53.9291	40805	40.805	74.2651
219.462	17339	4.05928	227269	227.269	413.629	54.0643	46168.3	46.1683	84.0263	229901	229.901	418.42	54.0643	40869.4	40.8694	74.3824
239.998	15102	4.50384	274634	274.634	499.834	53.2874	45816.5	45.8165	83.3859	277536	277.536	505.116	53.2874	40500.2	40.5002	73.7103
301.629	20177	5.93869	474144	474.144	862.941	50.7905	44703.4	44.7034	81.3602	473500	473.5	861.769	50.7905	39333.2	39.3332	71.5865
265.93	14952	5.08815	347147	347.147	631.807	52.2646	45357.2	45.3572	82.5502	349413	349.413	635.932	52.2646	40018.5	40.0185	72.8337
268.501	17108	5.14756	355189	355.189	646.443	52.1609	45310.9	45.3109	82.4659	357325	357.325	650.331	52.1609	39970	39.97	72.7453
177.757	14482	3.20124	153501	153.501	279.372	55.5275	46838.2	46.8382	85.2456	154233	154.233	280.703	55.5275	41573	41.573	75.6629
553.528	36545	14.417	2.20403e+06	2204.03	4011.33	38.3941	39560.4	39.5604	72	2.77424e+06	2774.24	5049.13	38.3941	33968	33.968	61.8218
169.706	11201	3.04201	142159	142.159	258.73	55.7875	46958.3	46.9583	85.464	142412	142.412	259.19	55.7875	41699.1	41.6991	75.8924
171.504	9972	3.0774	144621	144.621	263.21	55.7302	46931.8	46.9318	85.4158	144982	144.982	263.867	55.7302	41671.3	41.6713	75.8418
217.319	12948	4.01376	222786	222.786	405.471	54.1434	46204.3	46.2043	84.0918	225358	225.358	410.151	54.1434	40907.2	40.9072	74.4512
350.124	20264	7.19255	705384	705.384	1283.8	48.6787	43782.9	43.7829	79.6849	699084	699.084	1272.33	48.6787	38369.5	38.3695	69.8325
310.062	22780	6.14812	509272	509.272	926.875	50.432	44545.8	44.5458	81.0734	507646	507.646	923.916	50.432	39168.1	39.1681	71.286
138.102	8308	2.43537	104920	104.92	190.954	56.7068	47385.2	47.3852	86.241	103239	103.239	187.895	56.7068	42147.8	42.1478	76.7091
150.32	10296	2.66651	118043	118.043	214.838	56.3734	47229.9	47.2299	85.9584	117105	117.105	213.131	56.3734	41984.6	41.9846	76.412
184.021	11396	3.32651	162915	162.915	296.504	55.3195	46742.4	46.7424	85.0712	164004	164.004	298.487	55.3195	41472.3	41.4723	75.4797
159.195	8071	2.83705	128552	128.552	233.964	56.1129	47108.9	47.1089	85.7382	128161	128.161	233.254	56.1129	41857.4	41.8574	76.1806
241.944	18906	4.54678	279560	279.56	508.8	53.2122	45782.5	45.7825	83.3242	282456	282.456	514.069	53.2122	40464.6	40.4646	73.6456
297.856	16560	5.84609	459088	459.088	835.541	50.9496	44773.5	44.7735	81.4878	458855	458.855	835.116	50.9496	39406.7	39.4067	71.7202
160.004	8382	2.85271	129553	129.553	235.787	56.0884	47097.6	47.0976	85.7176	129213	129.213	235.167	56.0884	41845.5	41.8455	76.1589
345.172	29613	7.05875	678461	678.461	1234.8	48.8999	43878.4	43.8784	79.8587	672611	672.611	1224.15	48.8999	38469.5	38.4695	70.0144
193.5	18867	3.51844	178205	178.205	324.333	54.996	46593.8	46.5938	84.8007	179800	179.8	327.237	54.996	41316.2	41.3162	75.1955
248.341	19937	4.68894	296322	296.322	539.306	52.9631	45670.4	45.6704	83.1201	299150	299.15	544.453	52.9631	40346.9	40.3469	73.4314
366.703	32396	7.65093	801056	801.056	1457.92	47.9292	43460.7	43.4607	79.0985	794027	794.027	1445.13	47.9292	38032.5	38.0325	69.2192
137.249	11352	2.41938	104058	104.058	189.385	56.7289	47395.4	47.3954	86.2597	102327	102.327	186.234	56.7289	42158.6	42.1586	76.7287
135.183	7457	2.38076	101999	101.999	185.639	56.7815	47420	47.42	86.3044	100145	100.145	182.265	56.7815	42184.5	42.1845	76.7757
232.188	13348	4.33295	255648	255.648	465.279	53.5866	45951.6	45.9516	83.632	258518	258.518	470.503	53.5866	40642	40.642	73.9685
168.513	9117	3.01858	140548	140.548	255.798	55.8252	46975.7	46.9757	85.4958	140729	140.729	256.127	55.8252	41717.5	41.7175	75.9258
321.518	28669	6.43821	560350	560.35	1019.84	49.9391	44330	44.33	80.6806	557295	557.295	1014.28	49.9391	38942.1	38.9421	70.8747
297.03	19438	5.82591	455846	455.846	829.64	50.9843	44788.9	44.7889	81.5157	455700	455.7	829.373	50.9843	39422.8	39.4228	71.7494
278.923	18629	5.39123	389480	389.48	708.853	51.7364	45121.9	45.1219	82.1219	390955	390.955	711.539	51.7364	39771.8	39.7718	72.3846
138.906	9418	2.45045	105738	105.738	192.443	56.6859	47375.4	47.3754	86.2232	104105	104.105	189.472	56.6859	42137.6	42.1376	76.6904
143.995	8925	2.54633	111063	111.063	202.135	56.55	47312.1	47.3121	86.1079	109738	109.738	199.723	56.55	42071	42.071	76.5692
277.649	23650	5.36119	385139	385.139	700.954	51.7887	45145.1	45.1451	82.1641	386707	386.707	703.807	51.7887	39796.1	39.7961	72.4289
190.914	13635	3.46579	173904	173.904	316.506	55.0852	46634.7	46.6347	84.8752	175367	175.367	319.167	55.0852	41359.2	41.3592	75.2738
404.188	38592	8.75196	1.0474e+06	1047.4	1906.27	46.1826	42718.9	42.7189	77.7484	1.04791e+06	1047.91	1907.2	46.1826	37257.4	37.2574	67.8084
174.963	8458	3.14576	149471	149.471	272.037	55.6187	46880.3	46.8803	85.3221	150038	150.038	273.07	55.6187	41617.2	41.6172	75.7433
238.359	20636	4.46779	270546	270.546	492.394	53.3505	45844.9	45.8449	83.4378	273450	273.45	497.679	53.3505	40530.1	40.5301	73.7648
336.176	19319	6.8192	631504	631.504	1149.34	49.2985	44051.1	44.0511	80.173	626633	626.633	1140.47	49.2985	38650.2	38.6502	70.3433
289.118	29232	5.63416	425753	425.753	774.87	51.3152	44935.1	44.9351	81.7818	426385	426.385	776.021	51.3152	39576	39.576	72.0283
374.312	31886	7.86692	847782	847.782	1542.96	47.5805	43311.6	43.3116	78.8271	841005	841.005	1530.63	47.5805	37876.7	37.8767	68.9355
220.072	13699	4.07227	228560	228.56	415.979	54.0417	46158	46.158	84.0076	231208	231.208	420.799	54.0417	40858.7	40.8587	74.3628
282.323	20229	5.47174	401270	401.27	730.312	51.5966	45059.8	45.0598	82.0088	402486	402.486	732.524	51.5966	39706.7	39.7067	72.2662
154.977	9242	2.75571	123450	123.45	224.679	56.2384	47167.2	47.1672	85.8443	122799	122.799	223.494	56.2384	41918.7	41.9187	76.292
310.389	19981	6.15631	510676	510.676	929.43	50.418	44539.7	44.5397	81.0622	509011	509.011	926.399	50.418	39161.7	39.1617	71.2743
160.903	11825	2.87013	130675	130.675	237.828	56.0611	47084.9	47.0849	85.6946	130390	130.39	237.309	56.0611	41832.3	41.8323	76.1347
146.101	8321	2.58622	113342	113.342	206.282	56.4921	47285.1	47.2851	86.0589	112145	112.145	204.104	56.4921	42042.6	42.0426	76.5176
262.229	19537	5.00311	335852	335.852	611.25	52.4132	45423.7	45.4237	82.6711	338285	338.285	615.678	52.4132	40088.2	40.0882	72.9605
318.819	31895	6.36927	547962	547.962	997.291	50.0558	44381	44.381	80.7735	545250	545.25	992.355	50.0558	38995.6	38.9956	70.9719
85.923	4439	1.49258	63130.8	63.1308	114.898	57.5668	47787.9	47.7879	86.9741	58812.2	58.8122	107.038	57.5668	42571.4	42.5714	77.4799
163.45	15075	2.91963	133903	133.903	243.704	55.9832	47048.8	47.0488	85.6288	133775	133.775	243.47	55.9832	41794.3	41.7943	76.0656
350.786	26176	7.21054	709041	709.041	1290.45	48.649	43770.1	43.7701	79.6616	702687	702.687	1278.89	48.649	38356.1	38.3561	69.8082
247.76	15592	4.67597	294763	294.763	536.469	52.9859	45680.6	45.6806	83.1387	297600	297.6	541.632	52.9859	40357.7	40.3577	73.4509
108.612	4989	1.89405	78799.6	78.7996	143.415	57.3438	47683.1	47.6831	86.7833	75490	75.49	137.392	57.3438	42461.2	42.4612	77.2793
123.466	4803	2.16386	91049.7	91.0497	165.71	57.0583	47549.4	47.5494	86.5399	88523.5	88.5235	161.113	57.0583	42320.5	42.3205	77.0233
215.943	15755	3.98462	219951	219.951	400.311	54.1941	46227.3	46.2273	84.1338	222481	222.481	404.916	54.1941	40931.4	40.9314	74.4952
407.27	31119	8.84683	1.06935e+06	1069.35	1946.22	46.0357	42657.1	42.6571	77.6359	1.07142e+06	1071.42	1949.98	46.0357	37192.8	37.1928	67.6909
288.611	17142	5.62197	423883	423.883	771.468	51.3363	44944.4	44.9444	81.7988	424562	424.562	772.703	51.3363	39585.8	39.5858	72.0461
257.445	16044	4.89402	321734	321.734	585.557	52.604	45509.1	45.5091	82.8266	324343	324.343	590.305	52.604	40177.8	40.1778	73.1236
123.98	7278	2.17329	91505.1	91.5051	166.539	57.047	47544.1	47.5441	86.5302	89007.6	89.0076	161.994	57.047	42314.9	42.3149	77.0132
364.243	27549	7.58187	786325	786.325	1431.11	48.0413	43508.7	43.5087	79.1859	779307	779.307	1418.34	48.0413	38082.8	38.0828	69.3107
237.318	15912	4.44494	267979	267.979	487.722	53.3905	45863	45.863	83.4707	270881	270.881	493.003	53.3905	40549	40.549	73.7993
202.028	12531	3.69359	193108	193.108	351.456	54.6969	46456.8	46.4568	84.5513	195109	195.109	355.098	54.6969	41172.3	41.1723	74.9336
220.04	15147	4.07158	228492	228.492	415.856	54.0428	46158.6	46.1586	84.0086	231140	231.14	420.674	54.0428	40859.2	40.8592	74.3638
175.465	12104	3.15571	150187	150.187	273.341	55.6024	46872.8	46.8728	85.3084	150785	150.785	274.428	55.6024	41609.3	41.6093	75.7289
271.024	16416	5.20612	363239	363.239	661.095	52.0587	45265.4	45.2654	82.383	365234	365.234	664.726	52.0587	39922.2	39.9222	72.6584
169.292	7918	3.03387	141598	141.598	257.709	55.8006	46964.3	46.9643	85.4751	141826	141.826	258.124	55.8006	41705.5	41.7055	75.904
296.21	31816	5.8059	452647	452.647	823.817	51.0188	44804.1	44.8041	81.5434	452585	452.585	823.705	51.0188	39438.7	39.4387	71.7784
249.311	21794	4.71064	298941	298.941	544.073	52.9251	45653.3	45.6533	83.089	301753	301.753	549.19	52.9251	40329	40.329	73.3988
282.928	29288	5.48611	403400	403.4	734.188	51.5717	45048.7	45.0487	81.9887	404567	404.567	736.312	51.5717	39695.1	39.6951	72.2451
260.483	17117	4.96319	330637	330.637	601.759	52.483	45454.9	45.4549	82.7279	333139	333.139	606.313	52.483	40120.9	40.1209	73.0201
308.431	20190	6.10735	502317	502.317	914.217	50.5016	44576.4	44.5764	81.129	500887	500.887	911.614	50.5016	39200.2	39.2002	71.3443
331.311	23400	6.69149	607156	607.156	1105.02	49.5123	44144	44.144	80.3421	602871	602.871	1097.22	49.5123	38747.4	38.7474	70.5203
127.884	5087	2.24521	95037.4	95.0374	172.968	56.9586	47502.7	47.5027	86.4549	92759.9	92.7599	168.823	56.9586	42271.4	42.2714	76.934
253.445	20928	4.80351	310338	310.338	564.816	52.7624	45580.2	45.5802	82.956	313062	313.062	569.773	52.7624	40252.3	40.2523	73.2593
166.834	22824	2.98568	138310	138.31	251.725	55.878	47000.1	47.0001	85.5403	138389	138.389	251.868	55.878	41743.1	41.7431	75.9725
483.244	36100	11.4392	1.66178e+06	1661.78	3024.45	42.2445	41092	41.092	74.7874	1.79865e+06	1798.65	3273.54	42.2445	35560.6	35.5606	64.7203
307.787	21084	6.09128	499592	499.592	909.257	50.5291	44588.4	44.5884	81.151	498239	498.239	906.794	50.5291	39212.8	39.2128	71.3673
196.425	15112	3.57824	183190	183.19	333.406	54.8942	46547.1	46.5471	84.7158	184931	184.931	336.574	54.8942	41267.2	41.2672	75.1063
311.335	17360	6.18003	514755	514.755	936.854	50.3776	44521.9	44.5219	81.0299	512975	512.975	933.614	50.3776	39143.1	39.1431	71.2405
172.683	9624	3.10066	146257	146.257	266.187	55.6924	46914.3	46.9143	85.384	146689	146.689	266.974	55.6924	41652.9	41.6529	75.8084
115.342	4353	2.01559	84136.9	84.1369	153.129	57.2249	47627.4	47.6274	86.6819	81171.5	81.1715	147.732	57.2249	42402.5	42.4025	77.1726
292.651	20394	5.71943	438977	438.977	798.938	51.1679	44869.9	44.8699	81.6633	439274	439.274	799.479	51.1679	39507.7	39.5077	71.904
303.514	23145	5.98521	481817	481.817	876.907	50.7107	44668.3	44.6683	81.2963	480961	480.961	875.349	50.7107	39296.4	39.2964	71.5195
204.487	11593	3.74454	197617	197.617	359.663	54.6093	46416.7	46.4167	84.4785	199725	199.725	363.5	54.6093	41130.3	41.1303	74.8571
311.595	24539	6.18656	515881	515.881	938.903	50.3664	44517	44.517	81.021	514069	514.069	935.605	50.3664	39138	39.138	71.2312
144.68	9184	2.55929	111799	111.799	203.475	56.5313	47303.3	47.3033	86.0921	110516	110.516	201.139	56.5313	42061.8	42.0618	76.5525
262.787	24189	5.0159	337534	337.534	614.311	52.3908	45413.7	45.4137	82.6529	339943	339.943	618.697	52.3908	40077.7	40.0777	72.9414
347.495	22681	7.12134	690996	690.996	1257.61	48.7963	43833.6	43.8336	79.7772	684925	684.925	1246.56	48.7963	38422.6	38.4226	69.9292
532.276	51269	13.4416	2.04871e+06	2048.71	3728.65	39.5991	40033.6	40.0336	72.8611	2.44425e+06	2444.25	4448.54	39.5991	34459.5	34.4595	62.7163
141.796	11911	2.50481	108731	108.731	197.891	56.6094	47339.7	47.3397	86.1583	107272	107.272	195.236	56.6094	42100.1	42.1001	76.6222
439.122	34436	9.87073	1.30837e+06	1308.37	2381.23	44.4873	42010.9	42.0109	76.4598	1.34016e+06	1340.16	2439.08	44.4873	36518.4	36.5184	66.4634
183.89	12968	3.32388	162712	162.712	296.136	55.3239	46744.4	46.7444	85.0749	163794	163.794	298.106	55.3239	41474.5	41.4745	75.4835
103.086	5637	1.79511	74665.3	74.6653	135.891	57.4261	47721.8	47.7218	86.8537	71087.6	71.0876	129.379	57.4261	42501.8	42.5018	77.3533
249.743	15597	4.72031	300114	300.114	546.208	52.9082	45645.7	45.6457	83.0751	302918	302.918	551.311	52.9082	40321	40.321	73.3842
339.735	22960	6.91344	649781	649.781	1182.6	49.1413	43982.9	43.9829	80.0489	644502	644.502	1172.99	49.1413	38578.8	38.5788	70.2134
258.898	18256	4.92706	325965	325.965	593.257	52.5462	45483.2	45.4832	82.7795	328525	328.525	597.916	52.5462	40150.6	40.1506	73.0741
198.694	15607	3.62483	187147	187.147	340.608	54.8147	46510.7	46.5107	84.6494	188996	188.996	343.973	54.8147	41229	41.229	75.0367
302.398	23783	5.95765	477262	477.262	868.617	50.7579	44689.1	44.6891	81.3341	476532	476.532	867.288	50.7579	39318.2	39.3182	71.5591
288.859	20837	5.62793	424797	424.797	773.131	51.326	44939.8	44.9398	81.7905	425453	425.453	774.325	51.326	39581	39.581	72.0374
238.216	14305	4.46465	270192	270.192	491.75	53.356	45847.4	45.8474	83.4423	273096	273.096	497.034	53.356	40532.7	40.5327	73.7695
364.321	24324	7.58406	786790	786.79	1431.96	48.0377	43507.2	43.5072	79.1831	779770	779.77	1419.18	48.0377	38081.2	38.0812	69.3078
325.475	15365	6.53995	578910	578.91	1053.62	49.7672	44255	44.255	80.5441	575354	575.354	1047.14	49.7672	38863.6	38.8636	70.7318
226.792	10797	4.2162	243239	243.239	442.695	53.7906	46044.1	46.0441	83.8002	246035	246.035	447.783	53.7906	40739.1	40.7391	74.1451
299.685	24942	5.8909	466336	466.336	848.732	50.8726	44739.6	44.7396	81.426	465906	465.906	847.949	50.8726	39371.1	39.3711	71.6554
232.298	16963	4.33534	255907	255.907	465.75	53.5824	45949.7	45.9497	83.6285	258778	258.778	470.976	53.5824	40640.1	40.6401	73.9649
168.117	11755	3.01081	140017	140.017	254.832	55.8377	46981.5	46.9815	85.5063	140174	140.174	255.117	55.8377	41723.5	41.7235	75.9369
111.323	4119	1.94287	80908.7	80.9087	147.254	57.2982	47661.8	47.6618	86.7444	77735.4	77.7354	141.478	57.2982	42438.7	42.4387	77.2384
212.335	10083	3.90853	212676	212.676	387.07	54.3261	46287.5	46.2875	84.2432	215087	215.087	391.459	54.3261	40994.6	40.9946	74.6101
269.146	21824	5.1625	357232	357.232	650.162	52.1348	45299.3	45.2993	82.4447	359333	359.333	653.986	52.1348	39957.8	39.9578	72.7231
388.351	30080	8.27522	938486	938.486	1708.05	46.9294	43034.5	43.0345	78.3229	933634	933.634	1699.21	46.9294	37587.1	37.5871	68.4085
363.755	25912	7.56822	783425	783.425	1425.83	48.0635	43518.3	43.5183	79.2032	776413	776.413	1413.07	48.0635	38092.7	38.0927	69.3288
226.672	16900	4.21361	242969	242.969	442.204	53.7952	46046.1	46.0461	83.8039	245763	245.763	447.288	53.7952	40741.2	40.7412	74.149
120.06	6315	2.10149	88086.8	88.0868	160.318	57.131	47583.4	47.5834	86.6018	85373.5	85.3735	155.38	57.131	42356.3	42.3563	77.0884
217.959	10834	4.02734	224116	224.116	407.892	54.1198	46193.6	46.1936	84.0723	226707	226.707	412.606	54.1198	40896	40.896	74.4307
302.576	23950	5.96204	477986	477.986	869.935	50.7504	44685.8	44.6858	81.3281	477236	477.236	868.57	50.7504	39314.7	39.3147	71.5528
218.892	13096	4.04716	226068	226.068	411.445	54.0854	46177.9	46.1779	84.0437	228685	228.685	416.207	54.0854	40879.5	40.8795	74.4007
176.998	13037	3.18615	152396	152.396	277.361	55.5524	46849.7	46.8497	85.2665	153083	153.083	278.612	55.5524	41585.1	41.5851	75.6848
183.843	10538	3.32294	162640	162.64	296.004	55.3254	46745.2	46.7452	85.0762	163719	163.719	297.969	55.3254	41475.2	41.4752	75.4849
213.502	15790	3.93309	215004	215.004	391.308	54.2835	46268.1	46.2681	84.2079	217456	217.456	395.769	54.2835	40974.2	40.9742	74.573
279.676	20403	5.40902	392065	392.065	713.558	51.7055	45108.2	45.1082	82.0969	393485	393.485	716.142	51.7055	39757.4	39.7574	72.3584
304.322	20739	6.0052	485138	485.138	882.951	50.6764	44653.2	44.6532	81.2688	484189	484.189	881.225	50.6764	39280.6	39.2806	71.4907
227.857	15571	4.23916	245643	245.643	447.071	53.7505	46025.9	46.0259	83.7671	248457	248.457	452.192	53.7505	40720	40.72	74.1103
233.947	22030	4.37124	259816	259.816	472.866	53.5196	45921.3	45.9213	83.5768	262702	262.702	478.117	53.5196	40610.2	40.6102	73.9106
303.01	20606	5.97276	479756	479.756	873.155	50.732	44677.7	44.6777	81.3134	478957	478.957	871.701	50.732	39306.3	39.3063	71.5374
308.391	20869	6.10635	502147	502.147	913.908	50.5033	44577.1	44.5771	81.1304	500722	500.722	911.314	50.5033	39200.9	39.2009	71.3457
282.554	22073	5.47722	402082	402.082	731.79	51.5871	45055.6	45.0556	82.0012	403279	403.279	733.968	51.5871	39702.3	39.7023	72.2581
226.553	15008	4.21105	242702	242.702	441.718	53.7996	46048.1	46.0481	83.8076	245494	245.494	446.799	53.7996	40743.3	40.7433	74.1529
169.471	8466	3.03739	141841	141.841	258.15	55.7949	46961.7	46.9617	85.4703	142079	142.079	258.584	55.7949	41702.8	41.7028	75.899
188.155	15719	3.40986	169424	169.424	308.352	55.1796	46678.1	46.6781	84.9541	170740	170.74	310.747	55.1796	41404.8	41.4048	75.3567
445.751	38868	10.0945	1.36038e+06	1360.38	2475.88	44.1578	41874.6	41.8746	76.2119	1.40234e+06	1402.34	2552.26	44.1578	36376.3	36.3763	66.2048
364.375	24073	7.58557	787111	787.111	1432.54	48.0353	43506.2	43.5062	79.1812	780091	780.091	1419.77	48.0353	38080.1	38.0801	69.3058
206.21	17486	3.78037	200835	200.835	365.52	54.5476	46388.5	46.3885	84.4271	203015	203.015	369.487	54.5476	41100.7	41.1007	74.8032
269.705	14610	5.17547	359011	359.011	653.399	52.1122	45289.2	45.2892	82.4263	361081	361.081	657.167	52.1122	39947.2	39.9472	72.7039
161.09	7435	2.87376	130909	130.909	238.255	56.0555	47082.3	47.0823	85.6898	130636	130.636	237.757	56.0555	41829.5	41.8295	76.1297
172.824	10759	3.10344	146454	146.454	266.546	55.6878	46912.2	46.9122	85.3802	146894	146.894	267.347	55.6878	41650.7	41.6507	75.8044
328.81	22607	6.62633	594923	594.923	1082.76	49.6218	44191.6	44.1916	80.4288	590948	590.948	1075.53	49.6218	38797.3	38.7973	70.611
273.701	23912	5.26856	371954	371.954	676.957	51.9499	45216.9	45.2169	82.2947	373787	373.787	680.292	51.9499	39871.3	39.8713	72.5658
222.334	17355	4.12053	233407	233.407	424.801	53.9576	46119.8	46.1198	83.938	236112	236.112	429.723	53.9576	40818.6	40.8186	74.2898
278.035	25768	5.37029	386450	386.45	703.339	51.7728	45138.1	45.1381	82.1513	387990	387.99	706.142	51.7728	39788.8	39.7888	72.4155
156.105	13357	2.77741	124795	124.795	227.127	56.2051	47151.7	47.1517	85.8161	124214	124.214	226.069	56.2051	41902.5	41.9025	76.2625
241.318	13866	4.53295	277967	277.967	505.9	53.2364	45793.4	45.7934	83.3441	280865	280.865	511.175	53.2364	40476.1	40.4761	73.6664
313.898	20947	6.24453	525940	525.94	957.21	50.2677	44473.8	44.4738	80.9423	523844	523.844	953.396	50.2677	39092.7	39.0927	71.1487
232.479	17576	4.33928	256333	256.333	466.526	53.5755	45946.6	45.9466	83.6228	259206	259.206	471.755	53.5755	40636.8	40.6368	73.9589
147.429	9572	2.61144	114802	114.802	208.939	56.4551	47267.9	47.2679	86.0276	113686	113.686	206.909	56.4551	42024.6	42.0246	76.4847
292.647	17241	5.71933	438962	438.962	798.91	51.1681	44870	44.87	81.6634	439259	439.259	799.452	51.1681	39507.8	39.5078	71.9041
351.802	18881	7.23821	714680	714.68	1300.72	48.6035	43750.4	43.7504	79.6258	708247	708.247	1289.01	48.6035	38335.6	38.3356	69.7708
181.256	12334	3.27107	158694	158.694	288.822	55.4119	46784.9	46.7849	85.1486	159627	159.627	290.521	55.4119	41517	41.517	75.561
221.753	17072	4.10812	232153	232.153	422.519	53.9792	46129.6	46.1296	83.9559	234844	234.844	427.416	53.9792	40828.9	40.8289	74.3085
111.376	6414	1.94383	80950.5	80.9505	147.33	57.2973	47661.3	47.6613	86.7436	77779.9	77.7799	141.559	57.2973	42438.2	42.4382	77.2376
305.487	25024	6.03408	489959	489.959	891.725	50.6269	44631.4	44.6314	81.2292	488876	488.876	889.754	50.6269	39257.8	39.2578	71.4493
227.932	15294	4.24078	245814	245.814	447.381	53.7477	46024.6	46.0246	83.7648	248628	248.628	452.503	53.7477	40718.6	40.7186	74.1079
300.753	25866	5.91713	470612	470.612	856.514	50.8275	44719.7	44.7197	81.3899	470065	470.065	855.519	50.8275	39350.3	39.3503	71.6175
567.572	43521	15.1048	2.30056e+06	2300.56	4187.01	37.5755	39242.2	39.2422	71.4208	3.01035e+06	3010.35	5478.84	37.5755	33637.7	33.6377	61.2206
405.067	27321	8.77895	1.05364e+06	1053.64	1917.62	46.1407	42701.3	42.7013	77.7164	1.05457e+06	1054.57	1919.32	46.1407	37239	37.239	67.7749
182.048	8699	3.28692	159892	159.892	291.003	55.3855	46772.8	46.7728	85.1265	160870	160.87	292.784	55.3855	41504.3	41.5043	75.5378
126.461	9342	2.21895	93734.9	93.7349	170.597	56.9914	47518	47.518	86.4828	91376.5	91.3765	166.305	56.9914	42287.5	42.2875	76.9633
220.204	14422	4.07508	228840	228.84	416.489	54.0368	46155.8	46.1558	84.0035	231492	231.492	421.315	54.0368	40856.3	40.8563	74.3585
230.961	18546	4.30631	252776	252.776	460.053	53.6332	45972.7	45.9727	83.6703	255633	255.633	465.252	53.6332	40664.2	40.6642	74.0088
269.028	22359	5.15977	356857	356.857	649.48	52.1395	45301.4	45.3014	82.4486	358965	358.965	653.316	52.1395	39960	39.96	72.7272
225.748	12973	4.19373	240903	240.903	438.443	53.8299	46061.9	46.0619	83.8326	243679	243.679	443.497	53.8299	40757.7	40.7577	74.1791
350.465	24696	7.20181	707266	707.266	1287.22	48.6634	43776.3	43.7763	79.6729	700938	700.938	1275.71	48.6634	38362.6	38.3626	69.82
223.275	19255	4.14067	235452	235.452	428.522	53.9225	46103.9	46.1039	83.909	238177	238.177	433.483	53.9225	40801.8	40.8018	74.2593
236.683	15616	4.43103	266424	266.424	484.891	53.4149	45874	45.874	83.4907	269324	269.324	490.169	53.4149	40560.6	40.5606	73.8203
301.24	22360	5.92912	472573	472.573	860.082	50.8069	44710.6	44.7106	81.3734	471972	471.972	858.989	50.8069	39340.8	39.3408	71.6003
358.103	19338	7.41111	750368	750.368	1365.67	48.3197	43628.3	43.6283	79.4035	743540	743.54	1353.24	48.3197	38207.8	38.2078	69.5382
220.229	11993	4.07561	228893	228.893	416.586	54.0358	46155.4	46.1554	84.0028	231546	231.546	421.413	54.0358	40855.9	40.8559	74.3577
228.203	20680	4.24663	246429	246.429	448.501	53.7375	46020	46.02	83.7563	249248	249.248	453.632	53.7375	40713.8	40.7138	74.0991
202.56	13972	3.7046	194075	194.075	353.217	54.678	46448.1	46.4481	84.5356	196100	196.1	356.902	54.678	41163.3	41.1633	74.9171
380.986	23576	8.0594	890189	890.189	1620.14	47.2723	43180.2	43.1802	78.588	884057	884.057	1608.98	47.2723	37739.3	37.7393	68.6856
163.677	11340	2.92405	134194	134.194	244.234	55.9762	47045.6	47.0456	85.6229	134080	134.08	244.025	55.9762	41790.9	41.7909	76.0594
240.413	14775	4.51299	275678	275.678	501.734	53.2714	45809.2	45.8092	83.3728	278579	278.579	507.014	53.2714	40492.6	40.4926	73.6965
220.643	21239	4.08443	229775	229.775	418.19	54.0205	46148.4	46.1484	83.9901	232438	232.438	423.037	54.0205	40848.5	40.8485	74.3444
294.185	20318	5.75663	444826	444.826	809.583	51.1037	44841.6	44.8416	81.6116	444971	444.971	809.847	51.1037	39478	39.478	71.8499
215.7	10324	3.97948	219454	219.454	399.406	54.203	46231.4	46.2314	84.1412	221977	221.977	403.998	54.203	40935.7	40.9357	74.503
493.706	31360	11.841	1.7463e+06	1746.3	3178.26	41.6945	40869.7	40.8697	74.3828	1.92365e+06	1923.65	3501.05	41.6945	35329.1	35.3291	64.2991
244.972	15002	4.61387	287385	287.385	523.04	53.0946	45729.6	45.7296	83.2278	290257	290.257	528.267	53.0946	40409	40.409	73.5444
173.163	9632	3.11014	146928	146.928	267.409	55.6769	46907.2	46.9072	85.3711	147389	147.389	268.247	55.6769	41645.5	41.6455	75.7947
194.851	13214	3.54603	180492	180.492	328.495	54.9491	46572.3	46.5723	84.7616	182155	182.155	331.521	54.9491	41293.6	41.2936	75.1544
401.229	35839	8.66153	1.02655e+06	1026.55	1868.32	46.3231	42778.1	42.7781	77.8562	1.02574e+06	1025.74	1866.85	46.3231	37319.2	37.3192	67.921
173.469	8625	3.11619	147357	147.357	268.19	55.667	46902.6	46.9026	85.3628	147836	147.836	269.062	55.667	41640.7	41.6407	75.786
283.986	18714	5.5113	407148	407.148	741.009	51.528	45029.4	45.0294	81.9534	408229	408.229	742.976	51.528	39674.8	39.6748	72.2081
207.346	12732	3.80404	202984	202.984	369.431	54.5068	46369.9	46.3699	84.3932	205209	205.209	373.481	54.5068	41081.1	41.0811	74.7676
305.751	20135	6.04063	491057	491.057	893.723	50.6157	44626.5	44.6265	81.2202	489943	489.943	891.696	50.6157	39252.7	39.2527	71.4399
223.169	13464	4.1384	235220	235.22	428.101	53.9264	46105.7	46.1057	83.9123	237944	237.944	433.058	53.9264	40803.7	40.8037	74.2627
272.574	23866	5.24224	368263	368.263	670.239	51.9957	45237.3	45.2373	82.3319	370166	370.166	673.702	51.9957	39892.8	39.8928	72.6048
216.367	15474	3.9936	220821	220.821	401.894	54.1785	46220.2	46.2202	84.1209	223364	223.364	406.523	54.1785	40924	40.924	74.4817
196.164	22283	3.5729	182740	182.74	332.587	54.9034	46551.3	46.5513	84.7234	184468	184.468	335.731	54.9034	41271.6	41.2716	75.1143
177.597	8981	3.19806	153267	153.267	278.946	55.5327	46840.6	46.8406	85.25	153990	153.99	280.261	55.5327	41575.6	41.5756	75.6675
213.978	14072	3.94312	215961	215.961	393.048	54.2661	46260.1	46.2601	84.1935	218428	218.428	397.539	54.2661	40965.9	40.9659	74.5579
143.495	5067	2.53688	110529	110.529	201.162	56.5636	47318.4	47.3184	86.1195	109173	109.173	198.695	56.5636	42077.6	42.0776	76.5813
247.827	13011	4.67746	294942	294.942	536.795	52.9832	45679.4	45.6794	83.1365	297779	297.779	541.957	52.9832	40356.4	40.3564	73.4487
136.151	8279	2.39884	102959	102.959	187.385	56.757	47408.6	47.4086	86.2836	101162	101.162	184.115	56.757	42172.4	42.1724	76.7538
142.847	9329	2.52464	109840	109.84	199.908	56.5812	47326.6	47.3266	86.1344	108445	108.445	197.369	56.5812	42086.2	42.0862	76.597
121.915	6374	2.13542	89688.6	89.6886	163.233	57.0919	47565.1	47.5651	86.5684	87076.7	87.0767	158.48	57.0919	42337	42.337	77.0534
372.114	24399	7.80415	834106	834.106	1518.07	47.6815	43354.8	43.3548	78.9057	827207	827.207	1505.52	47.6815	37921.8	37.9218	69.0176
165.852	13071	2.96648	137017	137.017	249.372	55.9087	47014.3	47.0143	85.5661	137036	137.036	249.406	55.9087	41758.1	41.7581	75.9997
259.766	14393	4.94683	328516	328.516	597.9	52.5116	45467.7	45.4677	82.7513	331045	331.045	602.502	52.5116	40134.4	40.1344	73.0446
443.238	43587	10.0092	1.34059e+06	1340.59	2439.87	44.283	41926.4	41.9264	76.306	1.3785e+06	1378.5	2508.87	44.283	36430.2	36.4302	66.303
269.894	18116	5.17986	359614	359.614	654.497	52.1045	45285.8	45.2858	82.4201	361673	361.673	658.246	52.1045	39943.6	39.9436	72.6973
150.613	6071	2.6721	118376	118.376	215.445	56.365	47226	47.226	85.9513	117456	117.456	213.77	56.365	41980.5	41.9805	76.4045
242.101	13041	4.55025	279961	279.961	509.529	53.2061	45779.8	45.7798	83.3192	282856	282.856	514.797	53.2061	40461.7	40.4617	73.6403
366.429	23586	7.64322	799406	799.406	1454.92	47.9417	43466.1	43.4661	79.1082	792376	792.376	1442.12	47.9417	38038.1	38.0381	69.2294
317.429	15352	6.33391	541668	541.668	985.836	50.1158	44407.3	44.4073	80.8212	539131	539.131	981.219	50.1158	39023	39.023	71.0219
220.957	16377	4.09113	230445	230.445	419.41	54.0088	46143.1	46.1431	83.9804	233116	233.116	424.272	54.0088	40843	40.843	74.3342
374.576	29531	7.87448	849435	849.435	1545.97	47.5684	43306.4	43.3064	78.8177	842675	842.675	1533.67	47.5684	37871.2	37.8712	68.9257
214.776	15122	3.95996	217573	217.573	395.983	54.2369	46246.8	46.2468	84.1692	220066	220.066	400.521	54.2369	40951.9	40.9519	74.5325
114.518	5611	2.00065	83465	83.465	151.906	57.2405	47634.7	47.6347	86.6951	80456.4	80.4564	146.431	57.2405	42410.2	42.4102	77.1866
183.204	10524	3.31011	161656	161.656	294.215	55.3469	46755	46.755	85.0941	162700	162.7	296.114	55.3469	41485.6	41.4856	75.5038
232.387	15453	4.33728	256116	256.116	466.132	53.579	45948.2	45.9482	83.6257	258988	258.988	471.359	53.579	40638.4	40.6384	73.962
191.957	14278	3.487	175627	175.627	319.641	55.0493	46618.3	46.6183	84.8452	177143	177.143	322.401	55.0493	41341.9	41.3419	75.2423
129.085	6003	2.26742	96150.4	96.1504	174.994	56.9305	47489.6	47.4896	86.431	93941.6	93.9416	170.974	56.9305	42257.6	42.2576	76.9088
189.44	13702	3.43588	171497	171.497	312.125	55.1358	46657.9	46.6579	84.9175	172882	172.882	314.645	55.1358	41383.6	41.3836	75.3182
157.759	12224	2.8093	126793	126.793	230.763	56.1559	47128.9	47.1289	85.7746	126313	126.313	229.89	56.1559	41878.5	41.8785	76.2188
119.926	7203	2.09904	87972.2	87.9722	160.109	57.1337	47584.7	47.5847	86.6041	85251.5	85.2515	155.158	57.1337	42357.6	42.3576	77.0909
156.893	7690	2.7926	125743	125.743	228.852	56.1818	47140.9	47.1409	85.7964	125210	125.21	227.883	56.1818	41891	41.891	76.2417
200.665	14467	3.66544	190650	190.65	346.983	54.7452	46478.9	46.4789	84.5915	192590	192.59	350.514	54.7452	41195.5	41.1955	74.9759
290.164	21245	5.65934	429632	429.632	781.931	51.2717	44915.8	44.9158	81.7468	430168	430.168	782.906	51.2717	39555.8	39.5558	71.9915
235.987	13553	4.41579	264728	264.728	481.806	53.4416	45886.1	45.8861	83.5126	267626	267.626	487.079	53.4416	40573.2	40.5732	73.8433
163.365	11120	2.91797	133794	133.794	243.505	55.9858	47050	47.05	85.631	133660	133.66	243.262	55.9858	41795.6	41.7956	76.0679
260.279	13438	4.95853	330032	330.032	600.659	52.4911	45458.6	45.4586	82.7346	332542	332.542	605.227	52.4911	40124.8	40.1248	73.0271
152.558	7629	2.7093	120612	120.612	219.514	56.309	47200	47.2	85.904	119812	119.812	218.058	56.309	41953.2	41.9532	76.3548
327.165	29309	6.58365	586982	586.982	1068.31	49.6936	44222.9	44.2229	80.4857	583213	583.213	1061.45	49.6936	38830	38.83	70.6706
119.916	8462	2.09886	87963.6	87.9636	160.094	57.134	47584.8	47.5848	86.6043	85242.5	85.2425	155.141	57.134	42357.7	42.3577	77.0911
148.251	10351	2.62707	115715	115.715	210.6	56.4321	47257.2	47.2572	86.008	114649	114.649	208.661	56.4321	42013.3	42.0133	76.4642
279.23	21044	5.39848	390532	390.532	710.768	51.7238	45116.3	45.1163	82.1117	391985	391.985	713.413	51.7238	39765.9	39.7659	72.374
213.5	14455	3.93305	215000	215	391.3	54.2836	46268.1	46.2681	84.208	217452	217.452	395.762	54.2836	40974.2	40.9742	74.5731
311.168	17832	6.17584	514033	514.033	935.54	50.3847	44525.1	44.5251	81.0356	512273	512.273	932.337	50.3847	39146.4	39.1464	71.2465
171.357	10912	3.0745	144418	144.418	262.841	55.7349	46933.9	46.9339	85.4198	144771	144.771	263.482	55.7349	41673.6	41.6736	75.8459
128.118	7984	2.24953	95253.3	95.2533	173.361	56.9531	47500.2	47.5002	86.4503	92989.1	92.9891	169.24	56.9531	42268.8	42.2688	76.9291
208.582	12184	3.82985	205346	205.346	373.729	54.4622	46349.6	46.3496	84.3562	207620	207.62	377.868	54.4622	41059.8	41.0598	74.7288
305.22	24560	6.02746	488850	488.85	889.708	50.6383	44636.4	44.6364	81.2383	487798	487.798	887.793	50.6383	39263.1	39.2631	71.4588
399.94	37098	8.62234	1.01754e+06	1017.54	1851.92	46.3842	42803.9	42.8039	77.9031	1.0162e+06	1016.2	1849.49	46.3842	37346.1	37.3461	67.97
155.31	10336	2.76212	123846	123.846	225.399	56.2286	47162.6	47.1626	85.836	123215	123.215	224.251	56.2286	41913.9	41.9139	76.2833
130.178	7316	2.28766	97174.3	97.1743	176.857	56.9045	47477.4	47.4774	86.4089	95028.3	95.0283	172.952	56.9045	42244.9	42.2449	76.8856
231.005	17657	4.30726	252879	252.879	460.239	53.6315	45972	45.972	83.669	255736	255.736	465.44	53.6315	40663.4	40.6634	74.0073
285.58	23591	5.54933	412851	412.851	751.389	51.4621	45000.1	45.0001	81.9002	413797	413.797	753.111	51.4621	39644.1	39.6441	72.1523
141.532	8261	2.49984	108454	108.454	197.387	56.6165	47343	47.343	86.1643	106980	106.98	194.703	56.6165	42103.6	42.1036	76.6285
111.007	6412	1.93717	80660.1	80.6601	146.801	57.3037	47664.3	47.6643	86.7491	77470.7	77.4707	140.997	57.3037	42441.4	42.4414	77.2433
123.229	4579	2.15951	90840.4	90.8404	165.33	57.0635	47551.8	47.5518	86.5443	88301.1	88.3011	160.708	57.0635	42323	42.323	77.0279
364.173	33565	7.57991	785909	785.909	1430.35	48.0445	43510.1	43.5101	79.1884	778891	778.891	1417.58	48.0445	38084.2	38.0842	69.3133
328.165	35023	6.60958	591800	591.8	1077.08	49.6499	44203.9	44.2039	80.4511	587905	587.905	1069.99	49.6499	38810.1	38.8101	70.6344
160.085	8909	2.85428	129654	129.654	235.97	56.086	47096.4	47.0964	85.7155	129318	129.318	235.359	56.086	41844.3	41.8443	76.1567
211.797	17518	3.89722	211610	211.61	385.131	54.3457	46296.4	46.2964	84.2595	214003	214.003	389.485	54.3457	41003.9	41.0039	74.6272
223.953	22936	4.15519	236935	236.935	431.221	53.8971	46092.4	46.0924	83.8881	239675	239.675	436.209	53.8971	40789.8	40.7898	74.2373
225.392	16036	4.18608	240111	240.111	437.002	53.8432	46067.9	46.0679	83.8436	242881	242.881	442.043	53.8432	40764.1	40.7641	74.1906
147.286	8921	2.60872	114644	114.644	208.652	56.4591	47269.8	47.2698	86.031	113519	113.519	206.605	56.4591	42026.5	42.0265	76.4883
200.809	17271	3.66841	190908	190.908	347.453	54.7401	46476.5	46.4765	84.5873	192855	192.855	350.996	54.7401	41193.1	41.1931	74.9714
76.697	4674	1.33285	57671.6	57.6716	104.962	57.5435	47777	47.777	86.9541	53015.5	53.0155	96.4883	57.5435	42559.9	42.5599	77.4589
199.419	16247	3.63975	188429	188.429	342.94	54.7892	46499	46.499	84.6282	190311	190.311	346.367	54.7892	41216.7	41.2167	75.0144
258.204	21187	4.91127	323938	323.938	589.568	52.5738	45495.6	45.4956	82.802	326522	326.522	594.271	52.5738	40163.6	40.1636	73.0978
264.013	13868	5.04403	341255	341.255	621.085	52.3416	45391.7	45.3917	82.6129	343611	343.611	625.372	52.3416	40054.6	40.0546	72.8994
234.554	20985	4.38448	261269	261.269	475.51	53.4964	45910.8	45.9108	83.5577	264159	264.159	480.769	53.4964	40599.2	40.5992	73.8906
312.66	27585	6.21333	520513	520.513	947.334	50.3208	44497	44.497	80.9846	518570	518.57	943.798	50.3208	39117.1	39.1171	71.1931
300.117	24664	5.9015	468062	468.062	851.873	50.8543	44731.5	44.7315	81.4114	467585	467.585	851.004	50.8543	39362.7	39.3627	71.6401
230.491	16388	4.29612	251684	251.684	458.065	53.651	45980.8	45.9808	83.685	254535	254.535	463.254	53.651	40672.6	40.6726	74.0242
180.689	9155	3.25973	157841	157.841	287.271	55.4307	46793.6	46.7936	85.1644	158742	158.742	288.911	55.4307	41526.2	41.5262	75.5776
121.577	11744	2.12923	89394.7	89.3947	162.698	57.0991	47568.5	47.5685	86.5746	86764.2	86.7642	157.911	57.0991	42340.6	42.3406	77.0598
180.441	13460	3.25477	157469	157.469	286.594	55.4389	46797.4	46.7974	85.1713	158356	158.356	288.208	55.4389	41530.1	41.5301	75.5848
297.688	24262	5.84198	458427	458.427	834.338	50.9567	44776.7	44.7767	81.4935	458212	458.212	833.945	50.9567	39410	39.41	71.7261
274.399	21839	5.28489	374256	374.256	681.147	51.9214	45204.2	45.2042	82.2717	376044	376.044	684.4	51.9214	39858.1	39.8581	72.5417
133.771	8624	2.35442	100615	100.615	183.12	56.8169	47436.5	47.4365	86.3344	98678.2	98.6782	179.594	56.8169	42201.8	42.2018	76.8073
136.842	4541	2.41177	103649	103.649	188.642	56.7393	47400.3	47.4003	86.2686	101894	101.894	185.446	56.7393	42163.8	42.1638	76.7381
395.027	33721	8.47403	983581	983.581	1790.12	46.6162	42901.9	42.9019	78.0814	980505	980.505	1784.52	46.6162	37448.5	37.4485	68.1563
107.958	7050	1.8823	78298.9	78.2989	142.504	57.3543	47688.1	47.6881	86.7923	74956.8	74.9568	136.421	57.3543	42466.4	42.4664	77.2888
346.903	25104	7.10536	687785	687.785	1251.77	48.8227	43845.1	43.8451	79.798	681769	681.769	1240.82	48.8227	38434.6	38.4346	69.9509
245.654	17955	4.62904	289174	289.174	526.296	53.0681	45717.6	45.7176	83.206	292039	292.039	531.511	53.0681	40396.5	40.3965	73.5216
140.622	8368	2.4827	107505	107.505	195.66	56.6407	47354.3	47.3543	86.1849	105976	105.976	192.876	56.6407	42115.4	42.1154	76.6501
189.866	13007	3.44452	172190	172.19	313.385	55.1212	46651.2	46.6512	84.9053	173597	173.597	315.946	55.1212	41376.6	41.3766	75.3054
176.567	10857	3.17758	151772	151.772	276.225	55.5665	46856.2	46.8562	85.2783	152434	152.434	277.43	55.5665	41591.9	41.5919	75.6972
304.959	25363	6.02098	487769	487.769	887.739	50.6494	44641.3	44.6413	81.2472	486747	486.747	885.88	50.6494	39268.2	39.2682	71.4681
401.477	29306	8.66909	1.02829e+06	1028.29	1871.48	46.3113	42773.2	42.7732	77.8472	1.02759e+06	1027.59	1870.21	46.3113	37314	37.314	67.9116
274.403	23857	5.28498	374270	374.27	681.171	51.9213	45204.1	45.2041	82.2715	376057	376.057	684.424	51.9213	39858	39.858	72.5415
147.537	5880	2.61349	114921	114.921	209.157	56.4521	47266.5	47.2665	86.025	113812	113.812	207.138	56.4521	42023.1	42.0231	76.482
556.833	54825	14.5756	2.22721e+06	2227.21	4053.53	38.2031	39486	39.486	71.8644	2.82849e+06	2828.49	5147.85	38.2031	33890.7	33.8907	61.6811
145.979	7911	2.58391	113209	113.209	206.04	56.4955	47286.7	47.2867	86.0618	112004	112.004	203.848	56.4955	42044.3	42.0443	76.5206
331.857	28442	6.70576	609852	609.852	1109.93	49.4884	44133.6	44.1336	80.3231	605500	605.5	1102.01	49.4884	38736.5	38.7365	70.5005
264.766	16029	5.06134	343559	343.559	625.277	52.3114	45378.2	45.3782	82.5883	345881	345.881	629.503	52.3114	40040.5	40.0405	72.8736
279.358	30405	5.4015	390971	390.971	711.568	51.7186	45114	45.114	82.1074	392415	392.415	714.195	51.7186	39763.5	39.7635	72.3695
206.058	10896	3.7772	200549	200.549	365	54.5531	46391	46.391	84.4317	202723	202.723	368.955	54.5531	41103.3	41.1033	74.808
324.114	23415	6.50486	572472	572.472	1041.9	49.8264	44280.8	44.2808	80.5911	569089	569.089	1035.74	49.8264	38890.7	38.8907	70.781
153.559	9211	2.72849	121779	121.779	221.638	56.2799	47186.5	47.1865	85.8794	121040	121.04	220.293	56.2799	41939	41.939	76.3289
99.131	3979	1.72476	71837.1	71.8371	130.743	57.4753	47744.9	47.7449	86.8957	68076.1	68.0761	123.899	57.4753	42526.1	42.5261	77.3976
244.559	14222	4.6047	286306	286.306	521.077	53.1107	45736.8	45.7368	83.241	289182	289.182	526.311	53.1107	40416.6	40.4166	73.5582
143.818	7067	2.54298	110874	110.874	201.79	56.5548	47314.3	47.3143	86.112	109538	109.538	199.358	56.5548	42073.3	42.0733	76.5735
156.395	9994	2.783	125143	125.143	227.76	56.1966	47147.7	47.1477	85.8089	124580	124.58	226.735	56.1966	41898.3	41.8983	76.2548
196.317	13942	3.57603	183004	183.004	333.067	54.898	46548.9	46.5489	84.7189	184739	184.739	336.225	54.898	41269	41.269	75.1097
284.779	20092	5.5302	409977	409.977	746.157	51.4952	45014.8	45.0148	81.927	410991	410.991	748.004	51.4952	39659.5	39.6595	72.1804
192.598	13244	3.50005	176694	176.694	321.583	55.0272	46608.1	46.6081	84.8267	178243	178.243	324.402	55.0272	41331.3	41.3313	75.2229
105.206	3637	1.83298	76225.7	76.2257	138.731	57.3963	47707.8	47.7078	86.8282	72749.2	72.7492	132.404	57.3963	42487.1	42.4871	77.3265
281.281	18537	5.44701	397624	397.624	723.677	51.6395	45078.9	45.0789	82.0435	398922	398.922	726.038	51.6395	39726.7	39.7267	72.3025
224.401	11808	4.1648	237919	237.919	433.013	53.8804	46084.8	46.0848	83.8743	240669	240.669	438.018	53.8804	40781.8	40.7818	74.2228
89.963	4419	1.56315	65677.9	65.6779	119.534	57.5523	47781.1	47.7811	86.9616	61520.8	61.5208	111.968	57.5523	42564.2	42.5642	77.4669
187.234	15318	3.39125	167953	167.953	305.674	55.211	46692.5	46.6925	84.9803	169219	169.219	307.979	55.211	41419.9	41.4199	75.3842
101.784	7221	1.77191	73722.4	73.7224	134.175	57.4432	47729.8	47.7298	86.8683	70083.6	70.0836	127.552	57.4432	42510.3	42.5103	77.3687
203.067	7445	3.7151	195001	195.001	354.902	54.66	46439.9	46.4399	84.5206	197048	197.048	358.628	54.66	41154.6	41.1546	74.9014
267.107	20185	5.11531	350808	350.808	638.471	52.2171	45336.1	45.3361	82.5116	353017	353.017	642.49	52.2171	39996.3	39.9963	72.7933
302.983	22268	5.97209	479645	479.645	872.954	50.7332	44678.2	44.6782	81.3143	478849	478.849	871.506	50.7332	39306.8	39.3068	71.5384
161.839	6660	2.8883	131852	131.852	239.971	56.0326	47071.7	47.0717	85.6705	131625	131.625	239.557	56.0326	41818.4	41.8184	76.1094
243.818	11730	4.58826	284380	284.38	517.571	53.1395	45749.8	45.7498	83.2646	287262	287.262	522.818	53.1395	40430.2	40.4302	73.583
231.93	15428	4.32735	255041	255.041	464.175	53.5964	45956.1	45.9561	83.64	257909	257.909	469.395	53.5964	40646.7	40.6467	73.977
278.836	23318	5.38918	389182	389.182	708.311	51.74	45123.5	45.1235	82.1248	390664	390.664	711.008	51.74	39773.4	39.7734	72.3877
300.175	25488	5.90293	468294	468.294	852.295	50.8519	44730.5	44.7305	81.4094	467810	467.81	851.415	50.8519	39361.6	39.3616	71.638
222.954	16148	4.1338	234752	234.752	427.249	53.9344	46109.3	46.1093	83.9189	237471	237.471	432.197	53.9344	40807.5	40.8075	74.2697
119.283	6174	2.0873	87424.1	87.4241	159.112	57.147	47590.9	47.5909	86.6154	84668.7	84.6687	154.097	57.147	42364.2	42.3642	77.1028
246.023	18978	4.63725	290146	290.146	528.066	53.0537	45711.1	45.7111	83.1942	293007	293.007	533.272	53.0537	40389.7	40.3897	73.5092
129.42	9128	2.27362	96463.1	96.4631	175.563	56.9225	47485.9	47.4859	86.4243	94273.5	94.2735	171.578	56.9225	42253.7	42.2537	76.9018
179.857	11019	3.2431	156598	156.598	285.008	55.4583	46806.3	46.8063	85.1875	157451	157.451	286.561	55.4583	41539.5	41.5395	75.6019
238.53	15651	4.47155	270970	270.97	493.166	53.344	45842	45.842	83.4324	273874	273.874	498.45	53.344	40527	40.527	73.7591
102.239	5664	1.78001	74050.6	74.0506	134.772	57.4373	47727.1	47.7271	86.8633	70433	70.433	128.188	57.4373	42507.4	42.5074	77.3634
298.894	22976	5.8715	463190	463.19	843.006	50.9059	44754.3	44.7543	81.4528	462846	462.846	842.379	50.9059	39386.5	39.3865	71.6834
132.287	7524	2.32681	99179.9	99.1799	180.507	56.8535	47453.6	47.4536	86.3656	97156.2	97.1562	176.824	56.8535	42219.8	42.2198	76.84
255.469	25127	4.84923	316059	316.059	575.227	52.6824	45544.3	45.5443	82.8906	318728	318.728	580.085	52.6824	40214.7	40.2147	73.1907
274.243	18870	5.28124	373741	373.741	680.208	51.9278	45207	45.207	82.2768	375539	375.539	683.48	51.9278	39861	39.861	72.5471
183.194	13495	3.30991	161641	161.641	294.187	55.3472	46755.2	46.7552	85.0944	162684	162.684	296.085	55.3472	41485.8	41.4858	75.5041
208.875	14139	3.83597	205909	205.909	374.755	54.4516	46344.7	46.3447	84.3474	208194	208.194	378.914	54.4516	41054.7	41.0547	74.7195
157.549	9129	2.80525	126537	126.537	230.298	56.1622	47131.8	47.1318	85.7799	126045	126.045	229.402	56.1622	41881.5	41.8815	76.2244
193.219	10714	3.51271	177733	177.733	323.474	55.0057	46598.3	46.5983	84.8088	179314	179.314	326.351	55.0057	41320.9	41.3209	75.2041
307.384	23370	6.08124	497893	497.893	906.165	50.5462	44596	44.596	81.1647	496587	496.587	903.789	50.5462	39220.7	39.2207	71.3817
260.073	15243	4.95383	329423	329.423	599.55	52.4993	45462.2	45.4622	82.7413	331940	331.94	604.132	52.4993	40128.6	40.1286	73.0341
217.34	18288	4.01421	222830	222.83	405.55	54.1427	46203.9	46.2039	84.0912	225402	225.402	410.232	54.1427	40906.9	40.9069	74.4505
222.597	17043	4.12616	233977	233.977	425.838	53.9478	46115.4	46.1154	83.9299	236687	236.687	430.771	53.9478	40813.9	40.8139	74.2813
384.502	33895	8.16198	913052	913.052	1661.75	47.1089	43110.8	43.1108	78.4616	907450	907.45	1651.56	47.1089	37666.7	37.6667	68.5535
383.935	23849	8.14538	909341	909.341	1655	47.1353	43122	43.122	78.482	903644	903.644	1644.63	47.1353	37678.5	37.6785	68.5748
344.604	31946	7.04349	675422	675.422	1229.27	48.9252	43889.3	43.8893	79.8786	669628	669.628	1218.72	48.9252	38480.9	38.4809	70.0353
315.66	28183	6.28905	533742	533.742	971.41	50.192	44440.6	44.4406	80.8819	531427	531.427	967.196	50.192	39058	39.058	71.0855
186.016	8180	3.36667	166026	166.026	302.167	55.2522	46711.5	46.7115	85.0149	167226	167.226	304.351	55.2522	41439.8	41.4398	75.4205
89.395	5194	1.55321	65313.8	65.3138	118.871	57.5551	47782.4	47.7824	86.9641	61133.5	61.1335	111.263	57.5551	42565.6	42.5656	77.4694
138.125	10685	2.4358	104943	104.943	190.996	56.7062	47384.9	47.3849	86.2405	103264	103.264	187.94	56.7062	42147.5	42.1475	76.7085
280.148	21258	5.42018	393693	393.693	716.521	51.6861	45099.6	45.0996	82.0812	395077	395.077	719.041	51.6861	39748.4	39.7484	72.342
154.584	8244	2.74816	122985	122.985	223.832	56.25	47172.5	47.1725	85.854	122309	122.309	222.603	56.25	41924.3	41.9243	76.3023
168.694	16673	3.02213	140792	140.792	256.241	55.8195	46973.1	46.9731	85.491	140983	140.983	256.59	55.8195	41714.7	41.7147	75.9208
233.985	13117	4.37207	259907	259.907	473.031	53.5181	45920.7	45.9207	83.5756	262793	262.793	478.283	53.5181	40609.5	40.6095	73.9094
359.069	24342	7.43783	755948	755.948	1375.83	48.2761	43609.5	43.6095	79.3693	749076	749.076	1363.32	48.2761	38188.2	38.1882	69.5025
265.317	22227	5.07403	345253	345.253	628.361	52.2892	45368.3	45.3683	82.5702	347549	347.549	632.539	52.2892	40030.1	40.0301	72.8547
301.589	20718	5.93771	473982	473.982	862.647	50.7922	44704.1	44.7041	81.3615	473342	473.342	861.483	50.7922	39334	39.334	71.5879
268.903	22585	5.15687	356461	356.461	648.759	52.1446	45303.7	45.3037	82.4527	358575	358.575	652.607	52.1446	39962.4	39.9624	72.7315
382.754	34802	8.11088	901641	901.641	1640.99	47.1902	43145.3	43.1453	78.5245	895758	895.758	1630.28	47.1902	37702.8	37.7028	68.6192
337.28	29769	6.84836	637132	637.132	1159.58	49.2498	44030	44.03	80.1345	632132	632.132	1150.48	49.2498	38628	38.628	70.3031
331.148	25069	6.68723	606353	606.353	1103.56	49.5194	44147.1	44.1471	80.3477	602087	602.087	1095.8	49.5194	38750.7	38.7507	70.5262
324.319	22429	6.51014	573438	573.438	1043.66	49.8175	44276.9	44.2769	80.584	570029	570.029	1037.45	49.8175	38886.6	38.8866	70.7736
153.708	8337	2.73134	121953	121.953	221.955	56.2756	47184.4	47.1844	85.8757	121224	121.224	220.628	56.2756	41936.8	41.9368	76.325
153.997	10802	2.73689	122293	122.293	222.573	56.2672	47180.5	47.1805	85.8685	121581	121.581	221.278	56.2672	41932.7	41.9327	76.3175
321.231	21533	6.43086	559022	559.022	1017.42	49.9515	44335.4	44.3354	80.6905	556004	556.004	1011.93	49.9515	38947.8	38.9478	70.8851
226.885	15768	4.2182	243448	243.448	443.075	53.7871	46042.5	46.0425	83.7973	246245	246.245	448.166	53.7871	40737.4	40.7374	74.142
199.339	12179	3.6381	188287	188.287	342.682	54.792	46500.3	46.5003	84.6305	190166	190.166	346.102	54.792	41218	41.218	75.0168
186.865	13518	3.3838	167367	167.367	304.608	55.2235	46698.3	46.6983	84.9908	168613	168.613	306.876	55.2235	41426	41.426	75.3952
331.428	21919	6.69455	607733	607.733	1106.07	49.5072	44141.8	44.1418	80.338	603433	603.433	1098.25	49.5072	38745.1	38.7451	70.516
224.805	12957	4.17347	238811	238.811	434.635	53.8652	46077.9	46.0779	83.8618	241569	241.569	439.655	53.8652	40774.6	40.7746	74.2097
431.272	38527	9.61071	1.24765e+06	1247.65	2270.72	44.8741	42171.4	42.1714	76.752	1.26939e+06	1269.39	2310.29	44.8741	36685.8	36.6858	66.7682
347.285	27807	7.11567	689856	689.856	1255.54	48.8057	43837.7	43.8377	79.7846	683804	683.804	1244.52	48.8057	38426.9	38.4269	69.9369
190.034	13543	3.44793	172463	172.463	313.883	55.1154	46648.6	46.6486	84.9005	173879	173.879	316.461	55.1154	41373.8	41.3738	75.3003
274.129	20351	5.27857	373364	373.364	679.523	51.9324	45209.1	45.2091	82.2806	375170	375.17	682.809	51.9324	39863.2	39.8632	72.551
270.618	25533	5.19668	361933	361.933	658.717	52.0752	45272.7	45.2727	82.3963	363951	363.951	662.391	52.0752	39929.9	39.9299	72.6724
312.558	19265	6.21077	520068	520.068	946.524	50.3252	44499	44.499	80.9881	518138	518.138	943.01	50.3252	39119.1	39.1191	71.1967
233.656	19182	4.3649	259122	259.122	471.603	53.5307	45926.3	45.9263	83.5859	262006	262.006	476.85	53.5307	40615.5	40.6155	73.9202
406.694	33095	8.82905	1.06523e+06	1065.23	1938.72	46.0632	42668.7	42.6687	77.657	1.06699e+06	1066.99	1941.92	46.0632	37204.9	37.2049	67.7129
282.623	22392	5.47886	402325	402.325	732.232	51.5842	45054.3	45.0543	81.9989	403517	403.517	734.4	51.5842	39700.9	39.7009	72.2557
176.747	12054	3.18116	152032	152.032	276.699	55.5606	46853.5	46.8535	85.2733	152705	152.705	277.923	55.5606	41589	41.589	75.6921
152.525	9659	2.70867	120574	120.574	219.445	56.31	47200.4	47.2004	85.9048	119772	119.772	217.984	56.31	41953.6	41.9536	76.3556
198.046	11020	3.61151	186009	186.009	338.537	54.8375	46521.1	46.5211	84.6684	187827	187.827	341.846	54.8375	41239.9	41.2399	75.0566
286.62	17260	5.57421	416608	416.608	758.227	51.419	44981	44.981	81.8655	417465	417.465	759.786	51.419	39624.1	39.6241	72.1159
228.784	15609	4.25918	247754	247.754	450.912	53.7156	46010	46.01	83.7383	250582	250.582	456.059	53.7156	40703.3	40.7033	74.0801
165.847	11723	2.96638	137011	137.011	249.36	55.9089	47014.4	47.0144	85.5662	137029	137.029	249.393	55.9089	41758.1	41.7581	75.9998
196.247	13165	3.5746	182883	182.883	332.847	54.9005	46550	46.55	84.721	184615	184.615	335.999	54.9005	41270.2	41.2702	75.1118
191.136	9512	3.4703	174270	174.27	317.171	55.0776	46631.2	46.6312	84.8688	175744	175.744	319.853	55.0776	41355.6	41.3556	75.2671
179.113	18412	3.22826	155494	155.494	282.999	55.4829	46817.7	46.8177	85.2081	156304	156.304	284.474	55.4829	41551.4	41.5514	75.6235
206.493	14667	3.78626	201369	201.369	366.491	54.5375	46383.9	46.3839	84.4187	203560	203.56	370.479	54.5375	41095.8	41.0958	74.7944
146.037	10171	2.58501	113272	113.272	206.155	56.4939	47285.9	47.2859	86.0604	112071	112.071	203.969	56.4939	42043.5	42.0435	76.5192
336.978	30665	6.84037	635589	635.589	1156.77	49.2631	44035.7	44.0357	80.145	630624	630.624	1147.73	49.2631	38634.1	38.6341	70.3141
369.709	31217	7.73582	819307	819.307	1491.14	47.7918	43401.9	43.4019	78.9914	812322	812.322	1478.43	47.7918	37971.1	37.9711	69.1073
150.605	11463	2.67195	118367	118.367	215.428	56.3653	47226.1	47.2261	85.9515	117447	117.447	213.753	56.3653	41980.6	41.9806	76.4047
153.538	9648	2.72808	121754	121.754	221.593	56.2806	47186.7	47.1867	85.8799	121014	121.014	220.246	56.2806	41939.3	41.9393	76.3294
273.425	25928	5.26211	371047	371.047	675.306	51.9611	45221.9	45.2219	82.3038	372897	372.897	678.673	51.9611	39876.6	39.8766	72.5754
399.116	38989	8.59734	1.0118e+06	1011.8	1841.47	46.4232	42820.4	42.8204	77.933	1.01014e+06	1010.14	1838.46	46.4232	37363.3	37.3633	68.0012
160.609	13723	2.86443	130307	130.307	237.159	56.0701	47089.1	47.0891	85.7021	130004	130.004	236.607	56.0701	41836.6	41.8366	76.1426
185.538	16684	3.35704	165275	165.275	300.801	55.2684	46718.9	46.7189	85.0284	166449	166.449	302.937	55.2684	41447.6	41.4476	75.4347
235.237	17922	4.3994	262913	262.913	478.501	53.4703	45899	45.899	83.5363	265807	265.807	483.768	53.4703	40586.9	40.5869	73.8681
277.379	23725	5.35484	384225	384.225	699.289	51.7997	45150	45.15	82.1731	385811	385.811	702.177	51.7997	39801.3	39.8013	72.4383
260.17	19102	4.95605	329710	329.71	600.072	52.4955	45460.5	45.4605	82.7381	332224	332.224	604.647	52.4955	40126.8	40.1268	73.0308
205.102	11601	3.75732	198760	198.76	361.744	54.5873	46406.7	46.4067	84.4602	200894	200.894	365.627	54.5873	41119.7	41.1197	74.8379
161.829	10978	2.88811	131840	131.84	239.948	56.0329	47071.9	47.0719	85.6708	131612	131.612	239.533	56.0329	41818.5	41.8185	76.1097
169.358	13420	3.03517	141688	141.688	257.871	55.7985	46963.4	46.9634	85.4733	141920	141.92	258.294	55.7985	41704.5	41.7045	75.9022
201.011	7983	3.67258	191271	191.271	348.113	54.7329	46473.3	46.4733	84.5813	193227	193.227	351.673	54.7329	41189.7	41.1897	74.9652
183.287	11837	3.31177	161784	161.784	294.447	55.3441	46753.7	46.7537	85.0918	162832	162.832	296.355	55.3441	41484.2	41.4842	75.5013
219.929	13001	4.06922	228257	228.257	415.427	54.047	46160.4	46.1604	84.012	230901	230.901	420.24	54.047	40861.2	40.8612	74.3674
175.299	14872	3.15242	149950	149.95	272.909	55.6078	46875.3	46.8753	85.313	150537	150.537	273.978	55.6078	41611.9	41.6119	75.7337
167.713	13352	3.00289	139478	139.478	253.849	55.8504	46987.4	46.9874	85.517	139610	139.61	254.09	55.8504	41729.7	41.7297	75.9481
175.004	11207	3.14657	149529	149.529	272.143	55.6174	46879.7	46.8797	85.321	150099	150.099	273.18	55.6174	41616.6	41.6166	75.7422
270.532	11551	5.19468	361657	361.657	658.215	52.0786	45274.3	45.2743	82.3991	363680	363.68	661.898	52.0786	39931.5	39.9315	72.6753
131.54	9368	2.31293	98465	98.465	179.206	56.8717	47462.1	47.4621	86.381	96397.8	96.3978	175.444	56.8717	42228.7	42.2287	76.8563
174.835	11371	3.14322	149288	149.288	271.705	55.6228	46882.2	46.8822	85.3256	149849	149.849	272.724	55.6228	41619.2	41.6192	75.747
127.812	7954	2.24388	94971.1	94.9711	172.847	56.9602	47503.5	47.5035	86.4564	92689.5	92.6895	168.695	56.9602	42272.3	42.2723	76.9355
245.089	18407	4.61647	287691	287.691	523.597	53.0901	45727.5	45.7275	83.2241	290562	290.562	528.822	53.0901	40406.9	40.4069	73.5405
344.189	25973	7.03236	673208	673.208	1225.24	48.9436	43897.3	43.8973	79.8931	667456	667.456	1214.77	48.9436	38489.3	38.4893	70.0505
133.88	14455	2.35645	100721	100.721	183.313	56.8142	47435.2	47.4352	86.3321	98790.8	98.7908	179.799	56.8142	42200.5	42.2005	76.8049
126.807	5879	2.22533	94050	94.05	171.171	56.9834	47514.3	47.5143	86.4761	91711.2	91.7112	166.914	56.9834	42283.7	42.2837	76.9563
171.519	10740	3.0777	144641	144.641	263.247	55.7297	46931.6	46.9316	85.4154	145004	145.004	263.907	55.7297	41671.1	41.6711	75.8414
110.602	3989	1.92987	80342.5	80.3425	146.223	57.3106	47667.6	47.6676	86.755	77132.6	77.1326	140.381	57.3106	42444.8	42.4448	77.2496
60.368	2333	1.05494	49123.4	49.1234	89.4046	57.2242	47627	47.627	86.6812	43977.2	43.9772	80.0385	57.2242	42402.2	42.4022	77.172
142.314	8820	2.51458	109276	109.276	198.883	56.5955	47333.3	47.3333	86.1465	107849	107.849	196.285	56.5955	42093.3	42.0933	76.6098
131.729	10214	2.31644	98645.4	98.6454	179.535	56.8671	47460	47.46	86.3771	96589.2	96.5892	175.792	56.8671	42226.5	42.2265	76.8522
187.811	8533	3.40291	168873	168.873	307.349	55.1913	46683.5	46.6835	84.9639	170171	170.171	309.711	55.1913	41410.4	41.4104	75.367
95.934	3887	1.66817	69627.7	69.6277	126.722	57.5084	47760.5	47.7605	86.9241	65724	65.724	119.618	57.5084	42542.5	42.5425	77.4274
117.353	9020	2.05213	85799	85.799	156.154	57.1859	47609.1	47.6091	86.6486	82940	82.94	150.951	57.1859	42383.3	42.3833	77.1376
229.561	23148	4.27598	249536	249.536	454.155	53.6862	45996.7	45.9967	83.714	252375	252.375	459.322	53.6862	40689.4	40.6894	74.0547
295.99	26037	5.80054	451791	451.791	822.26	51.028	44808.1	44.8081	81.5508	451753	451.753	822.19	51.028	39443	39.443	71.7862
170.924	10223	3.06597	143822	143.822	261.757	55.7487	46940.3	46.9403	85.4314	144149	144.149	262.351	55.7487	41680.3	41.6803	75.8582
155.263	9356	2.76121	123790	123.79	225.297	56.23	47163.3	47.1633	85.8372	123156	123.156	224.144	56.23	41914.6	41.9146	76.2845
140.919	8023	2.48829	107814	107.814	196.222	56.6328	47350.7	47.3507	86.1782	106303	106.303	193.471	56.6328	42111.6	42.1116	76.643
120.215	7518	2.10432	88219.6	88.2196	160.56	57.1277	47581.9	47.5819	86.599	85514.7	85.5147	155.637	57.1277	42354.7	42.3547	77.0855
162.429	9249	2.89976	132600	132.6	241.332	56.0146	47063.3	47.0633	85.6553	132409	132.409	240.984	56.0146	41809.6	41.8096	76.0934
224.048	20143	4.15723	237143	237.143	431.601	53.8936	46090.8	46.0908	83.8852	239886	239.886	436.592	53.8936	40788.1	40.7881	74.2343
212.031	17469	3.90214	212073	212.073	385.973	54.3372	46292.5	46.2925	84.2524	214474	214.474	390.343	54.3372	40999.9	40.9999	74.6198
98.385	5106	1.71153	71315.5	71.3155	129.794	57.4836	47748.8	47.7488	86.9028	67520.8	67.5208	122.888	57.4836	42530.2	42.5302	77.405
173.435	11250	3.11552	147309	147.309	268.103	55.6681	46903.1	46.9031	85.3637	147786	147.786	268.971	55.6681	41641.2	41.6412	75.787
219.07	16979	4.05094	226443	226.443	412.126	54.0788	46174.9	46.1749	84.0383	229064	229.064	416.897	54.0788	40876.4	40.8764	74.395
229.214	13653	4.26847	248739	248.739	452.704	53.6993	46002.7	46.0027	83.7249	251573	251.573	457.863	53.6993	40695.6	40.6956	74.066
120.944	12721	2.11765	88846.7	88.8467	161.701	57.1125	47574.7	47.5747	86.586	86181.5	86.1815	156.85	57.1125	42347.2	42.3472	77.0718
157.799	6814	2.81007	126841	126.841	230.851	56.1547	47128.3	47.1283	85.7736	126365	126.365	229.984	56.1547	41877.9	41.8779	76.2177
174.611	13848	3.13879	148970	148.97	271.126	55.6301	46885.6	46.8856	85.3317	149517	149.517	272.121	55.6301	41622.8	41.6228	75.7534
317.72	24375	6.34131	542981	542.981	988.225	50.1032	44401.8	44.4018	80.8112	540407	540.407	983.541	50.1032	39017.3	39.0173	71.0115
126.013	8217	2.21069	93328.4	93.3284	169.858	57.0015	47522.8	47.5228	86.4915	90944.8	90.9448	165.519	57.0015	42292.6	42.2926	76.9725
151.202	8044	2.68335	119049	119.049	216.67	56.3481	47218.1	47.2181	85.937	118165	118.165	215.061	56.3481	41972.3	41.9723	76.3895
157.729	8678	2.80872	126756	126.756	230.696	56.1568	47129.3	47.1293	85.7753	126275	126.275	229.821	56.1568	41878.9	41.8789	76.2196
171.881	12102	3.08483	145142	145.142	264.158	55.7181	46926.2	46.9262	85.4057	145526	145.526	264.857	55.7181	41665.4	41.6654	75.8311
224.008	16441	4.15637	237055	237.055	431.441	53.8951	46091.4	46.0914	83.8864	239797	239.797	436.43	53.8951	40788.8	40.7888	74.2356
246.925	18675	4.65734	292535	292.535	532.414	53.0185	45695.3	45.6953	83.1654	295385	295.385	537.6	53.0185	40373.1	40.3731	73.479
197.431	10844	3.59888	184935	184.935	336.582	54.859	46531	46.531	84.6864	186724	186.724	339.837	54.859	41250.3	41.2503	75.0755
349.593	22880	7.17814	702460	702.46	1278.48	48.7025	43793.1	43.7931	79.7035	696205	696.205	1267.09	48.7025	38380.3	38.3803	69.8521
48.234	2209	0.852251	43591.4	43.5914	79.3364	56.596	47333.5	47.3335	86.1469	38169.3	38.1693	69.4681	56.596	42093.5	42.0935	76.6102
204.479	12428	3.74438	197602	197.602	359.636	54.6096	46416.9	46.4169	84.4787	199710	199.71	363.472	54.6096	41130.4	41.1304	74.8574
304.874	24282	6.01888	487417	487.417	887.099	50.653	44642.9	44.6429	81.2501	486405	486.405	885.257	50.653	39269.8	39.2698	71.4711
166.855	11136	2.98609	138338	138.338	251.776	55.8774	46999.8	46.9998	85.5397	138418	138.418	251.921	55.8774	41742.8	41.7428	75.9719
354.166	27543	7.3028	727925	727.925	1324.82	48.4973	43704.7	43.7047	79.5425	721323	721.323	1312.81	48.4973	38287.7	38.2877	69.6836
317.872	26187	6.34517	543668	543.668	989.475	50.0967	44398.9	44.3989	80.806	541075	541.075	984.756	50.0967	39014.3	39.0143	71.006
191.535	11547	3.47841	174928	174.928	318.369	55.0639	46624.9	46.6249	84.8574	176423	176.423	321.089	55.0639	41348.9	41.3489	75.2551
134.464	9165	2.36734	101292	101.292	184.352	56.7996	47428.4	47.4284	86.3198	99396	99.396	180.901	56.7996	42193.3	42.1933	76.7919
166.902	11534	2.98701	138400	138.4	251.889	55.8759	46999.2	46.9992	85.5385	138483	138.483	252.039	55.8759	41742.1	41.7421	75.9706
430.299	34177	9.57884	1.24019e+06	1240.19	2257.15	44.9218	42191.3	42.1913	76.7881	1.26083e+06	1260.83	2294.71	44.9218	36706.5	36.7065	66.8059
160.187	11020	2.85625	129781	129.781	236.201	56.0829	47095	47.095	85.7129	129451	129.451	235.602	56.0829	41842.8	41.8428	76.154
271.108	20590	5.20808	363510	363.51	661.587	52.0553	45263.8	45.2638	82.3802	365500	365.5	665.21	52.0553	39920.6	39.9206	72.6555
218.217	14316	4.03282	224655	224.655	408.871	54.1103	46189.2	46.1892	84.0644	227252	227.252	413.599	54.1103	40891.4	40.8914	74.4224
548.569	51069	14.1827	2.16872e+06	2168.72	3947.08	38.6788	39671.7	39.6717	72.2025	2.69435e+06	2694.35	4903.72	38.6788	34083.6	34.0836	62.0321
250.052	14687	4.72724	300956	300.956	547.74	52.896	45640.2	45.6402	83.0652	303754	303.754	552.833	52.896	40315.3	40.3153	73.3738
241.984	15292	4.54766	279662	279.662	508.985	53.2106	45781.8	45.7818	83.3229	282557	282.557	514.255	53.2106	40463.9	40.4639	73.6442
323.985	24507	6.50154	571865	571.865	1040.79	49.832	44283.3	44.2833	80.5956	568498	568.498	1034.67	49.832	38893.2	38.8932	70.7857
141.054	8578	2.49083	107955	107.955	196.478	56.6293	47349	47.349	86.1751	106451	106.451	193.742	56.6293	42109.8	42.1098	76.6398
140.109	6226	2.47305	106974	106.974	194.693	56.6543	47360.7	47.3607	86.1964	105414	105.414	191.853	56.6543	42122.1	42.1221	76.6622
306.766	20081	6.06586	495297	495.297	901.44	50.5726	44607.5	44.6075	81.1857	494064	494.064	899.197	50.5726	39232.8	39.2328	71.4037
165.852	8512	2.96648	137017	137.017	249.372	55.9087	47014.3	47.0143	85.5661	137036	137.036	249.406	55.9087	41758.1	41.7581	75.9997
293.041	27995	5.72887	440458	440.458	801.633	51.1516	44862.7	44.8627	81.6501	440717	440.717	802.104	51.1516	39500.1	39.5001	71.8902
329.665	32654	6.64857	599084	599.084	1090.33	49.5844	44175.4	44.1754	80.3991	595002	595.002	1082.9	49.5844	38780.2	38.7802	70.58
264.623	21793	5.05806	343120	343.12	624.479	52.3171	45380.7	45.3807	82.5929	345449	345.449	628.716	52.3171	40043.1	40.0431	72.8785
147.257	9170	2.60817	114612	114.612	208.593	56.4599	47270.1	47.2701	86.0316	113485	113.485	206.543	56.4599	42026.9	42.0269	76.489
125.423	9927	2.19983	92795.6	92.7956	168.888	57.0149	47529	47.529	86.5029	90378.8	90.3788	164.489	57.0149	42299.1	42.2991	76.9844
311.056	28057	6.17303	513549	513.549	934.66	50.3895	44527.2	44.5272	81.0394	511803	511.803	931.481	50.3895	39148.6	39.1486	71.2505
183.332	12714	3.31268	161853	161.853	294.572	55.3426	46753	46.753	85.0905	162904	162.904	296.485	55.3426	41483.5	41.4835	75.5
229.577	14242	4.27632	249573	249.573	454.222	53.6856	45996.5	45.9965	83.7135	252412	252.412	459.39	53.6856	40689.1	40.6891	74.0541
152.997	7383	2.71771	121123	121.123	220.443	56.2963	47194.1	47.1941	85.8932	120349	120.349	219.036	56.2963	41946.9	41.9469	76.3434
283.342	17915	5.49596	404863	404.863	736.851	51.5546	45041.2	45.0412	81.9749	405997	405.997	738.914	51.5546	39687.1	39.6871	72.2306
285.257	26748	5.54162	411690	411.69	749.275	51.4754	45006	45.006	81.911	412664	412.664	751.048	51.4754	39650.3	39.6503	72.1636
123.765	7951	2.16935	91314.4	91.3144	166.192	57.0518	47546.3	47.5463	86.5343	88804.8	88.8048	161.625	57.0518	42317.3	42.3173	77.0174
458.503	32942	10.5362	1.46189e+06	1461.89	2660.65	43.5168	41610.8	41.6108	75.7317	1.52843e+06	1528.43	2781.74	43.5168	36101.2	36.1012	65.7041
315.596	28652	6.28743	533457	533.457	970.891	50.1947	44441.8	44.4418	80.8841	531150	531.15	966.692	50.1947	39059.2	39.0592	71.0878
173.642	10967	3.11961	147600	147.6	268.633	55.6615	46900	46.9	85.3581	148090	148.09	269.523	55.6615	41638	41.638	75.7811
193.986	12088	3.52836	179024	179.024	325.825	54.9792	46586.1	46.5861	84.7866	180644	180.644	328.772	54.9792	41308.1	41.3081	75.1808
116.553	6342	2.03758	85134	85.134	154.944	57.2016	47616.5	47.6165	86.662	82232.5	82.2325	149.663	57.2016	42391	42.391	77.1517
190.217	13135	3.45164	172762	172.762	314.427	55.1092	46645.7	46.6457	84.8952	174188	174.188	317.022	55.1092	41370.8	41.3708	75.2948
400.032	32267	8.62513	1.01818e+06	1018.18	1853.08	46.3798	42802.1	42.8021	77.8998	1.01688e+06	1016.88	1850.73	46.3798	37344.2	37.3442	67.9665
188.993	13113	3.42683	170773	170.773	310.807	55.151	46665	46.665	84.9302	172134	172.134	313.284	55.151	41391	41.391	75.3316
232.48	13506	4.3393	256335	256.335	466.531	53.5755	45946.6	45.9466	83.6228	259209	259.209	471.76	53.5755	40636.8	40.6368	73.9589
216.232	12139	3.99074	220544	220.544	401.39	54.1835	46222.5	46.2225	84.125	223083	223.083	406.011	54.1835	40926.4	40.9264	74.486
349.346	29718	7.17144	701104	701.104	1276.01	48.7135	43797.9	43.7979	79.7122	694869	694.869	1264.66	48.7135	38385.3	38.3853	69.8612
171.749	10924	3.08223	144959	144.959	263.826	55.7223	46928.2	46.9282	85.4092	145335	145.335	264.51	55.7223	41667.5	41.6675	75.8348
275.832	17620	5.31848	379022	379.022	689.819	51.863	45178.2	45.1782	82.2243	380715	380.715	692.901	51.863	39830.8	39.8308	72.492
459.338	43370	10.5657	1.4686e+06	1468.6	2672.84	43.4745	41593.4	41.5934	75.7001	1.53699e+06	1536.99	2797.32	43.4745	36083.1	36.0831	65.6712
283.304	24739	5.49506	404729	404.729	736.606	51.5561	45041.8	45.0418	81.9762	405865	405.865	738.675	51.5561	39687.9	39.6879	72.2319
265.86	19542	5.08654	346930	346.93	631.413	52.2674	45358.5	45.3585	82.5525	349200	349.2	635.544	52.2674	40019.8	40.0198	72.8361
206.918	12841	3.79512	202172	202.172	367.953	54.5222	46376.9	46.3769	84.406	204380	204.38	371.972	54.5222	41088.5	41.0885	74.7811
241.535	15453	4.53774	278518	278.518	506.903	53.228	45789.7	45.7897	83.3372	281416	281.416	512.176	53.228	40472.1	40.4721	73.6592
331.593	23899	6.69886	608548	608.548	1107.56	49.4999	44138.6	44.1386	80.3323	604227	604.227	1099.69	49.4999	38741.8	38.7418	70.51
279.051	20254	5.39425	389918	389.918	709.651	51.7312	45119.6	45.1196	82.1176	391384	391.384	712.32	51.7312	39769.3	39.7693	72.3802
267.378	17080	5.12157	351656	351.656	640.014	52.2062	45331.2	45.3312	82.5027	353851	353.851	644.008	52.2062	39991.2	39.9912	72.784
234.912	13326	4.3923	262130	262.13	477.076	53.4827	45904.7	45.9047	83.5465	265021	265.021	482.339	53.4827	40592.8	40.5928	73.8788
138.629	9884	2.44525	105455	105.455	191.929	56.6931	47378.8	47.3788	86.2294	103806	103.806	188.927	56.6931	42141.1	42.1411	76.6968
181.518	14808	3.27631	159089	159.089	289.542	55.4032	46780.9	46.7809	85.1413	160037	160.037	291.268	55.4032	41512.8	41.5128	75.5533
126.672	6223	2.22284	93926.9	93.9269	170.947	56.9865	47515.8	47.5158	86.4787	91580.5	91.5805	166.677	56.9865	42285.2	42.2852	76.959
138.562	10073	2.44399	105387	105.387	191.804	56.6949	47379.6	47.3796	86.2308	103734	103.734	188.796	56.6949	42142	42.142	76.6984
262.29	21952	5.00451	336035	336.035	611.584	52.4107	45422.6	45.4226	82.6691	338466	338.466	616.007	52.4107	40087	40.087	72.9584
246.955	19557	4.65801	292615	292.615	532.56	53.0173	45694.7	45.6947	83.1644	295464	295.464	537.744	53.0173	40372.5	40.3725	73.478
300.367	18807	5.90765	469063	469.063	853.695	50.8438	44726.9	44.7269	81.4029	468558	468.558	852.776	50.8438	39357.8	39.3578	71.6312
200.292	16693	3.65774	189982	189.982	345.768	54.7584	46484.9	46.4849	84.6025	191905	191.905	349.268	54.7584	41201.9	41.2019	74.9874
259.513	15850	4.94106	327771	327.771	596.543	52.5217	45472.2	45.4722	82.7595	330309	330.309	601.163	52.5217	40139.1	40.1391	73.0532
183.25	8887	3.31103	161727	161.727	294.343	55.3453	46754.3	46.7543	85.0928	162773	162.773	296.247	55.3453	41484.8	41.4848	75.5024
206.57	12399	3.78786	201514	201.514	366.755	54.5347	46382.6	46.3826	84.4164	203708	203.708	370.749	54.5347	41094.5	41.0945	74.792
141.972	5723	2.50813	108916	108.916	198.227	56.6047	47337.5	47.3375	86.1543	107468	107.468	195.592	56.6047	42097.8	42.0978	76.618
130.432	9652	2.29237	97413.8	97.4138	177.293	56.8984	47474.6	47.4746	86.4038	95282.4	95.2824	173.414	56.8984	42241.9	42.2419	76.8802
150.513	10316	2.67019	118262	118.262	215.238	56.3679	47227.3	47.2273	85.9537	117336	117.336	213.552	56.3679	41981.9	41.9819	76.4071
190.384	14107	3.45503	173035	173.035	314.924	55.1034	46643.1	46.6431	84.8904	174470	174.47	317.535	55.1034	41368	41.368	75.2898
110.942	6078	1.936	80609	80.609	146.708	57.3048	47664.8	47.6648	86.75	77416.4	77.4164	140.898	57.3048	42441.9	42.4419	77.2443
193.126	10757	3.51081	177577	177.577	323.19	55.009	46599.7	46.5997	84.8115	179153	179.153	326.059	55.009	41322.5	41.3225	75.2069
318.465	27611	6.36026	546354	546.354	994.364	50.0711	44387.7	44.3877	80.7856	543686	543.686	989.509	50.0711	39002.6	39.0026	70.9847
222.004	16519	4.11348	232694	232.694	423.504	53.9699	46125.4	46.1254	83.9482	235391	235.391	428.411	53.9699	40824.4	40.8244	74.3004
221.177	15661	4.09582	230916	230.916	420.267	54.0006	46139.4	46.1394	83.9737	233593	233.593	425.139	54.0006	40839.1	40.8391	74.3271
109.362	6416	1.90754	79377.7	79.3777	144.467	57.3315	47677.4	47.6774	86.7728	76105.4	76.1054	138.512	57.3315	42455.1	42.4551	77.2683
147.47	9754	2.61222	114847	114.847	209.022	56.454	47267.4	47.2674	86.0266	113734	113.734	206.996	56.454	42024	42.024	76.4837
142.785	9574	2.52347	109774	109.774	199.789	56.5828	47327.4	47.3274	86.1358	108375	108.375	197.243	56.5828	42087.1	42.0871	76.5985
273.348	23105	5.26031	370795	370.795	674.846	51.9643	45223.3	45.2233	82.3064	372649	372.649	678.222	51.9643	39878.1	39.8781	72.5781
282.14	20132	5.46739	400628	400.628	729.143	51.6042	45063.2	45.0632	82.0149	401858	401.858	731.382	51.6042	39710.2	39.7102	72.2726
408.175	26598	8.87483	1.07584e+06	1075.84	1958.03	45.9924	42638.9	42.6389	77.6029	1.0784e+06	1078.4	1962.68	45.9924	37173.8	37.1738	67.6564
159.761	13016	2.848	129252	129.252	235.238	56.0958	47101	47.101	85.7238	128896	128.896	234.591	56.0958	41849.1	41.8491	76.1654
161.846	9372	2.88844	131861	131.861	239.988	56.0324	47071.6	47.0716	85.6703	131634	131.634	239.574	56.0324	41818.3	41.8183	76.1092
125.353	7570	2.19854	92732.6	92.7326	168.773	57.0164	47529.8	47.5298	86.5042	90311.9	90.3119	164.368	57.0164	42299.9	42.2999	76.9858
199.166	10845	3.63454	187981	187.981	342.125	54.7981	46503.1	46.5031	84.6356	189852	189.852	345.53	54.7981	41221	41.221	75.0222
259.808	19330	4.94779	328640	328.64	598.125	52.5099	45467	45.467	82.7499	331168	331.168	602.725	52.5099	40133.6	40.1336	73.0431
190.7	14397	3.46145	173553	173.553	315.866	55.0926	46638.1	46.6381	84.8814	175004	175.004	318.507	55.0926	41362.8	41.3628	75.2803
337.94	27157	6.86582	640514	640.514	1165.74	49.2206	44017.3	44.0173	80.1115	635438	635.438	1156.5	49.2206	38614.8	38.6148	70.279
166.862	14752	2.98623	138347	138.347	251.792	55.8772	46999.7	46.9997	85.5395	138428	138.428	251.939	55.8772	41742.7	41.7427	75.9717
297.463	21842	5.83648	457543	457.543	832.729	50.9661	44780.8	44.7808	81.5011	457351	457.351	832.379	50.9661	39414.3	39.4143	71.7341
150.194	13030	2.6641	117900	117.9	214.578	56.377	47231.6	47.2316	85.9614	116954	116.954	212.856	56.377	41986.4	41.9864	76.4152
101.887	4678	1.77374	73796.6	73.7966	134.31	57.4419	47729.2	47.7292	86.8672	70162.6	70.1626	127.696	57.4419	42509.6	42.5096	77.3676
257.761	26595	4.9012	322650	322.65	587.224	52.5914	45503.5	45.5035	82.8164	325249	325.249	591.953	52.5914	40171.9	40.1719	73.1128
373.868	24475	7.85421	845008	845.008	1537.91	47.601	43320.3	43.3203	78.843	838203	838.203	1525.53	47.601	37885.8	37.8858	68.9521
166.444	10406	2.97805	137796	137.796	250.788	55.8902	47005.8	47.0058	85.5505	137850	137.85	250.888	55.8902	41749.1	41.7491	75.9833
291.287	19160	5.68644	433831	433.831	789.572	51.2249	44895.1	44.8951	81.7091	434260	434.26	790.353	51.2249	39534.1	39.5341	71.952
216.233	16395	3.99076	220546	220.546	401.393	54.1834	46222.5	46.2225	84.1249	223085	223.085	406.015	54.1834	40926.3	40.9263	74.4859
282.759	21148	5.4821	402804	402.804	733.103	51.5786	45051.8	45.0518	81.9943	403985	403.985	735.252	51.5786	39698.3	39.6983	72.251
161.889	8061	2.88927	131916	131.916	240.086	56.0311	47071	47.071	85.6692	131691	131.691	239.678	56.0311	41817.6	41.8176	76.1081
137.141	7801	2.41736	103949	103.949	189.188	56.7317	47396.7	47.3967	86.2621	102212	102.212	186.025	56.7317	42160	42.16	76.7312
431.949	32645	9.63292	1.25284e+06	1252.84	2280.17	44.8409	42157.6	42.1576	76.7269	1.27537e+06	1275.37	2321.18	44.8409	36671.4	36.6714	66.742
208.456	15153	3.82721	205104	205.104	373.289	54.4668	46351.6	46.3516	84.36	207373	207.373	377.418	54.4668	41061.9	41.0619	74.7327
153.691	8807	2.73102	121934	121.934	221.919	56.2761	47184.7	47.1847	85.8761	121203	121.203	220.59	56.2761	41937.1	41.9371	76.3255
146.752	10996	2.59858	114055	114.055	207.581	56.474	47276.7	47.2767	86.0436	112898	112.898	205.475	56.474	42033.8	42.0338	76.5015
91.609	5394	1.59202	66744.3	66.7443	121.475	57.5427	47776.6	47.7766	86.9534	62655.3	62.6553	114.033	57.5427	42559.5	42.5595	77.4583
165.539	13433	2.96036	136608	136.608	248.626	55.9185	47018.9	47.0189	85.5743	136607	136.607	248.625	55.9185	41762.8	41.7628	76.0083
170.138	10537	3.0505	142747	142.747	259.8	55.7737	46951.9	46.9519	85.4525	143026	143.026	260.308	55.7737	41692.5	41.6925	75.8803
190.618	16898	3.45978	173418	173.418	315.622	55.0954	46639.4	46.6394	84.8837	174865	174.865	318.255	55.0954	41364.1	41.3641	75.2827
139.83	5802	2.46781	106686	106.686	194.169	56.6617	47364.1	47.3641	86.2026	105109	105.109	191.299	56.6617	42125.7	42.1257	76.6687
278.411	16894	5.37915	387730	387.73	705.669	51.7574	45131.2	45.1312	82.1389	389243	389.243	708.423	51.7574	39781.6	39.7816	72.4025
81.579	3951	1.41712	60500	60.5	110.11	57.5666	47787.8	47.7878	86.9738	56017.1	56.0171	101.951	57.5666	42571.3	42.5713	77.4797
123.18	5894	2.15861	90797.2	90.7972	165.251	57.0646	47552.3	47.5523	86.5452	88255.2	88.2552	160.624	57.0646	42323.6	42.3236	77.0289
260.371	17147	4.96063	330305	330.305	601.155	52.4874	45456.9	45.4569	82.7316	332811	332.811	605.717	52.4874	40123	40.123	73.0239
224.642	19380	4.16997	238451	238.451	433.98	53.8713	46080.7	46.0807	83.8668	241205	241.205	438.994	53.8713	40777.5	40.7775	74.215
106.902	5104	1.86335	77497	77.497	141.044	57.3708	47695.8	47.6958	86.8064	74102.9	74.1029	134.867	57.3708	42474.5	42.4745	77.3036
272.594	21447	5.2427	368328	368.328	670.358	51.9949	45236.9	45.2369	82.3312	370230	370.23	673.818	51.9949	39892.4	39.8924	72.6041
159.008	11288	2.83343	128321	128.321	233.545	56.1185	47111.5	47.1115	85.743	127919	127.919	232.813	56.1185	41860.2	41.8602	76.1855
176.906	11431	3.18432	152263	152.263	277.118	55.5554	46851.1	46.8511	85.269	152945	152.945	278.359	55.5554	41586.5	41.5865	75.6875
217.677	18776	4.02136	223529	223.529	406.823	54.1302	46198.3	46.1983	84.0809	226111	226.111	411.523	54.1302	40900.9	40.9009	74.4397
206.762	10402	3.79186	201877	201.877	367.415	54.5278	46379.5	46.3795	84.4107	204079	204.079	371.423	54.5278	41091.2	41.0912	74.7859
220.31	13888	4.07734	229066	229.066	416.899	54.0328	46154	46.154	84.0003	231720	231.72	421.73	54.0328	40854.4	40.8544	74.3551
216.287	14926	3.9919	220657	220.657	401.595	54.1814	46221.6	46.2216	84.1233	223198	223.198	406.22	54.1814	40925.4	40.9254	74.4842
76.296	3101	1.32596	57445.2	57.4452	104.55	57.5404	47775.5	47.7755	86.9514	52775.4	52.7754	96.0512	57.5404	42558.3	42.5583	77.4562
179.561	9109	3.2372	156158	156.158	284.207	55.4681	46810.8	46.8108	85.1957	156994	156.994	285.729	55.4681	41544.2	41.5442	75.6105
143.247	11809	2.53219	110265	110.265	200.682	56.5703	47321.5	47.3215	86.1252	108894	108.894	198.187	56.5703	42080.9	42.0809	76.5873
164.733	13181	2.94463	135558	135.558	246.716	55.9435	47030.4	47.0304	85.5954	135508	135.508	246.625	55.9435	41775	41.775	76.0305
168.672	10115	3.0217	140762	140.762	256.187	55.8202	46973.4	46.9734	85.4916	140952	140.952	256.533	55.8202	41715	41.715	75.9214
163.362	7370	2.91791	133790	133.79	243.498	55.9859	47050.1	47.0501	85.6311	133656	133.656	243.255	55.9859	41795.6	41.7956	76.068
337.168	30409	6.8454	636559	636.559	1158.54	49.2547	44032.1	44.0321	80.1384	631572	631.572	1149.46	49.2547	38630.3	38.6303	70.3071
308.703	21199	6.11414	503471	503.471	916.318	50.49	44571.3	44.5713	81.1197	502009	502.009	913.656	50.49	39194.8	39.1948	71.3346
307.407	24330	6.08182	497990	497.99	906.341	50.5453	44595.5	44.5955	81.1639	496682	496.682	903.96	50.5453	39220.2	39.2202	71.3808
188.304	14567	3.41288	169663	169.663	308.787	55.1746	46675.8	46.6758	84.9499	170987	170.987	311.197	55.1746	41402.3	41.4023	75.3523
321.489	21347	6.43746	560215	560.215	1019.59	49.9403	44330.6	44.3306	80.6816	557165	557.165	1014.04	49.9403	38942.7	38.9427	70.8757
379.079	37874	8.00411	877938	877.938	1597.85	47.3606	43217.8	43.2178	78.6564	871576	871.576	1586.27	47.3606	37778.6	37.7786	68.7571
317.259	24405	6.32959	540902	540.902	984.442	50.1231	44410.5	44.4105	80.827	538387	538.387	979.864	50.1231	39026.4	39.0264	71.028
478.44	38206	11.2588	1.62288e+06	1622.88	2953.64	42.4946	41193.5	41.1935	74.9721	1.74344e+06	1743.44	3173.05	42.4946	35666.3	35.6663	64.9127
201.024	16172	3.67285	191294	191.294	348.156	54.7325	46473.1	46.4731	84.581	193251	193.251	351.716	54.7325	41189.4	41.1894	74.9648
154.016	7231	2.73725	122315	122.315	222.613	56.2666	47180.3	47.1803	85.8681	121605	121.605	221.32	56.2666	41932.4	41.9324	76.317
117.299	6623	2.05115	85753.9	85.7539	156.072	57.1869	47609.6	47.6096	86.6495	82892	82.892	150.864	57.1869	42383.8	42.3838	77.1386
186.296	17236	3.37232	166467	166.467	302.97	55.2428	46707.1	46.7071	85.0069	167682	167.682	305.181	55.2428	41435.3	41.4353	75.4122
208.62	13783	3.83064	205419	205.419	373.862	54.4609	46348.9	46.3489	84.3551	207694	207.694	378.003	54.4609	41059.1	41.0591	74.7276
61.946	3053	1.08153	49891.9	49.8919	90.8032	57.276	47651.4	47.6514	86.7255	44787	44.787	81.5123	57.276	42427.7	42.4277	77.2185
154.381	11071	2.74426	122745	122.745	223.396	56.2559	47175.3	47.1753	85.859	122057	122.057	222.144	56.2559	41927.2	41.9272	76.3076
311.517	22769	6.1846	515543	515.543	938.288	50.3698	44518.5	44.5185	81.0237	513740	513.74	935.007	50.3698	39139.6	39.1396	71.234
283.196	23804	5.49249	404347	404.347	735.911	51.5606	45043.8	45.0438	81.9798	405492	405.492	737.995	51.5606	39689.9	39.6899	72.2357
267.957	22157	5.13496	353474	353.474	643.322	52.1828	45320.7	45.3207	82.4837	355638	355.638	647.261	52.1828	39980.2	39.9802	72.764
263.819	20455	5.03958	340664	340.664	620.008	52.3494	45395.2	45.3952	82.6192	343029	343.029	624.312	52.3494	40058.3	40.0583	72.9061
157.483	8487	2.80398	126457	126.457	230.152	56.1642	47132.7	47.1327	85.7816	125961	125.961	229.249	56.1642	41882.5	41.8825	76.2261
149.228	10504	2.64568	116809	116.809	212.591	56.4045	47244.3	47.2443	85.9847	115803	115.803	210.762	56.4045	41999.8	41.9998	76.4396
347.515	28120	7.12188	691104	691.104	1257.81	48.7954	43833.3	43.8333	79.7765	685032	685.032	1246.76	48.7954	38422.2	38.4222	69.9284
159.224	9448	2.83761	128588	128.588	234.03	56.112	47108.5	47.1085	85.7375	128199	128.199	233.322	56.112	41857	41.857	76.1798
227.016	16747	4.22102	243743	243.743	443.612	53.7822	46040.2	46.0402	83.7932	246542	246.542	448.707	53.7822	40735	40.735	74.1378
138.761	7586	2.44773	105590	105.59	192.174	56.6897	47377.2	47.3772	86.2264	103949	103.949	189.187	56.6897	42139.4	42.1394	76.6938
232.387	18662	4.33728	256116	256.116	466.132	53.579	45948.2	45.9482	83.6257	258988	258.988	471.359	53.579	40638.4	40.6384	73.962
505.067	37564	12.2921	1.8373e+06	1837.3	3343.88	41.0887	40626.2	40.6262	73.9397	2.06701e+06	2067.01	3761.95	41.0887	35075.8	35.0758	63.8379
180.665	13240	3.25925	157805	157.805	287.205	55.4315	46794	46.794	85.1651	158705	158.705	288.843	55.4315	41526.5	41.5265	75.5783
84.472	5086	1.46733	62239.8	62.2398	113.276	57.5687	47788.8	47.7888	86.9756	57865.3	57.8653	105.315	57.5687	42572.3	42.5723	77.4816
314.816	25431	6.2677	529993	529.993	964.587	50.2283	44456.5	44.4565	80.9108	527783	527.783	960.565	50.2283	39074.6	39.0746	71.1158
149.114	8091	2.6435	116680	116.68	212.358	56.4077	47245.8	47.2458	85.9874	115668	115.668	210.516	56.4077	42001.4	42.0014	76.4425
413.297	35402	9.03441	1.11294e+06	1112.94	2025.56	45.747	42535.9	42.5359	77.4153	1.11861e+06	1118.61	2035.87	45.747	37066.2	37.0662	67.4605
240.957	14389	4.52498	277052	277.052	504.234	53.2504	45799.7	45.7997	83.3555	279951	279.951	509.512	53.2504	40482.7	40.4827	73.6784
315.478	23709	6.28445	532932	532.932	969.935	50.1998	44444	44.444	80.8881	530639	530.639	965.763	50.1998	39061.5	39.0615	71.092
236.627	17841	4.4298	266287	266.287	484.642	53.4171	45875	45.875	83.4925	269187	269.187	489.92	53.4171	40561.6	40.5616	73.8221
290.165	27142	5.65937	429636	429.636	781.938	51.2716	44915.8	44.9158	81.7467	430172	430.172	782.912	51.2716	39555.8	39.5558	71.9915
253.333	19886	4.80099	310024	310.024	564.245	52.7669	45582.2	45.5822	82.9596	312751	312.751	569.207	52.7669	40254.4	40.2544	73.263
366.003	27962	7.63124	796846	796.846	1450.26	47.9611	43474.4	43.4744	79.1234	789815	789.815	1437.46	47.9611	38046.8	38.0468	69.2453
198.236	13362	3.61541	186342	186.342	339.143	54.8308	46518.1	46.5181	84.6629	188170	188.17	342.469	54.8308	41236.7	41.2367	75.0508
404.038	34965	8.74736	1.04634e+06	1046.34	1904.34	46.1897	42721.9	42.7219	77.7539	1.04678e+06	1046.78	1905.14	46.1897	37260.5	37.2605	67.8141
148.598	11859	2.63368	116102	116.102	211.306	56.4223	47252.6	47.2526	85.9998	115058	115.058	209.405	56.4223	42008.5	42.0085	76.4555
110.753	5762	1.93259	80460.7	80.4607	146.439	57.308	47666.4	47.6664	86.7528	77258.5	77.2585	140.611	57.308	42443.5	42.4435	77.2472
234.54	12622	4.38418	261236	261.236	475.449	53.4969	45911.1	45.9111	83.5582	264125	264.125	480.708	53.4969	40599.5	40.5995	73.8911
124.631	7103	2.18526	92085.2	92.0852	167.595	57.0326	47537.3	47.5373	86.5179	89623.9	89.6239	163.116	57.0326	42307.8	42.3078	77.0003
361.275	34597	7.49905	768799	768.799	1399.21	48.1761	43566.6	43.5666	79.2912	761845	761.845	1386.56	48.1761	38143.3	38.1433	69.4208
80.782	3583	1.40333	60029.1	60.0291	109.253	57.5645	47786.9	47.7869	86.9721	55517.1	55.5171	101.041	57.5645	42570.3	42.5703	77.4779
315.441	27501	6.28351	532767	532.767	969.636	50.2014	44444.7	44.4447	80.8894	530479	530.479	965.472	50.2014	39062.3	39.0623	71.0933
193.655	17598	3.5216	178466	178.466	324.808	54.9906	46591.3	46.5913	84.7962	180069	180.069	327.726	54.9906	41313.6	41.3136	75.1908
105.849	6084	1.84448	76705.3	76.7053	139.604	57.3868	47703.3	47.7033	86.8201	73259.9	73.2599	133.333	57.3868	42482.4	42.4824	77.318
93.113	4812	1.61845	67733.5	67.7335	123.275	57.5323	47771.7	47.7717	86.9445	63707.8	63.7078	115.948	57.5323	42554.3	42.5543	77.4488
397.548	33145	8.54992	1.00092e+06	1000.92	1821.68	46.4973	42851.6	42.8516	77.99	998694	998.694	1817.62	46.4973	37396	37.396	68.0607
147.238	10168	2.60781	114591	114.591	208.555	56.4605	47270.4	47.2704	86.0321	113463	113.463	206.503	56.4605	42027.2	42.0272	76.4894
274.758	16167	5.29329	375445	375.445	683.31	51.9068	45197.7	45.1977	82.2598	377210	377.21	686.522	51.9068	39851.2	39.8512	72.5292
205.593	11578	3.76753	199677	199.677	363.413	54.5697	46398.6	46.3986	84.4455	201832	201.832	367.333	54.5697	41111.3	41.1113	74.8226
183.512	10979	3.31629	162130	162.13	295.076	55.3365	46750.3	46.7503	85.0855	163191	163.191	297.007	55.3365	41480.6	41.4806	75.4947
180.122	14907	3.2484	156993	156.993	285.727	55.4495	46802.3	46.8023	85.1802	157861	157.861	287.308	55.4495	41535.3	41.5353	75.5942
240.498	16682	4.51486	275892	275.892	502.124	53.2681	45807.7	45.8077	83.3701	278793	278.793	507.404	53.2681	40491.1	40.4911	73.6937
162.059	8716	2.89257	132131	132.131	240.478	56.0259	47068.6	47.0686	85.6649	131917	131.917	240.088	56.0259	41815.1	41.8151	76.1035
285.794	17324	5.55445	413622	413.622	752.791	51.4532	44996.2	44.9962	81.8931	414550	414.55	754.481	51.4532	39640	39.64	72.1448
252.172	16939	4.77484	306788	306.788	558.354	52.8126	45602.7	45.6027	82.997	309542	309.542	563.367	52.8126	40276	40.276	73.3023
217.605	13513	4.01983	223380	223.38	406.551	54.1329	46199.5	46.1995	84.0831	225960	225.96	411.247	54.1329	40902.2	40.9022	74.442
395.455	33134	8.48688	986514	986.514	1795.45	46.596	42893.4	42.8934	78.0659	983574	983.574	1790.1	46.596	37439.6	37.4396	68.1401
384.911	32301	8.17396	915735	915.735	1666.64	47.0899	43102.7	43.1027	78.4469	910204	910.204	1656.57	47.0899	37658.3	37.6583	68.5381
108.645	7283	1.89464	78825	78.825	143.461	57.3432	47682.9	47.6829	86.7829	75516.9	75.5169	137.441	57.3432	42460.9	42.4609	77.2789
136.535	6747	2.40602	103342	103.342	188.082	56.7472	47404	47.404	86.2752	101568	101.568	184.854	56.7472	42167.6	42.1676	76.7451
234.767	18522	4.38913	261781	261.781	476.441	53.4883	45907.2	45.9072	83.551	264672	264.672	481.703	53.4883	40595.4	40.5954	73.8836
134.312	8590	2.36451	101143	101.143	184.081	56.8034	47430.2	47.4302	86.323	99238.1	99.2381	180.613	56.8034	42195.2	42.1952	76.7953
213.186	9268	3.92643	214371	214.371	390.156	54.2951	46273.3	46.2733	84.2175	216812	216.812	394.598	54.2951	40979.7	40.9797	74.5831
175.384	9669	3.1541	150071	150.071	273.13	55.605	46874	46.874	85.3107	150664	150.664	274.208	55.605	41610.6	41.6106	75.7313
156.815	8817	2.79109	125649	125.649	228.681	56.1841	47142	47.142	85.7984	125111	125.111	227.702	56.1841	41892.2	41.8922	76.2438
185.791	9997	3.36213	165672	165.672	301.523	55.2598	46715	46.715	85.0212	166860	166.86	303.684	55.2598	41443.5	41.4435	75.4272
352.523	33847	7.25787	718701	718.701	1308.04	48.5711	43736.5	43.7365	79.6004	712214	712.214	1296.23	48.5711	38321	38.321	69.7442
287.44	19044	5.59386	419592	419.592	763.657	51.3849	44966	44.966	81.838	420376	420.376	765.084	51.3849	39608.3	39.6083	72.0872
152.555	9368	2.70924	120609	120.609	219.508	56.3091	47200	47.2	85.904	119808	119.808	218.051	56.3091	41953.2	41.9532	76.3548
145.342	12230	2.57183	112515	112.515	204.778	56.5131	47294.9	47.2949	86.0767	111272	111.272	202.515	56.5131	42052.9	42.0529	76.5363
262.416	24044	5.0074	336415	336.415	612.275	52.4057	45420.3	45.4203	82.665	338840	338.84	616.688	52.4057	40084.7	40.0847	72.9541
245.995	19233	4.63662	290072	290.072	527.932	53.0548	45711.6	45.7116	83.1951	292933	292.933	533.138	53.0548	40390.2	40.3902	73.5102
117.567	6020	2.05603	85977.7	85.9777	156.479	57.1816	47607.1	47.6071	86.6449	83130.1	83.1301	151.297	57.1816	42381.2	42.3812	77.1338
371.127	29293	7.77607	828011	828.011	1506.98	47.7268	43374.1	43.3741	78.9409	821072	821.072	1494.35	47.7268	37942	37.942	69.0545
277.859	28998	5.36614	385852	385.852	702.25	51.78	45141.3	45.1413	82.1572	387405	387.405	705.076	51.78	39792.1	39.7921	72.4216
302.846	23364	5.96871	479086	479.086	871.937	50.739	44680.7	44.6807	81.3189	478306	478.306	870.517	50.739	39309.5	39.3095	71.5432
312.887	25670	6.21905	521505	521.505	949.138	50.3111	44492.8	44.4928	80.9769	519534	519.534	945.551	50.3111	39112.6	39.1126	71.1849
248.119	23952	4.68398	295725	295.725	538.22	52.9718	45674.3	45.6743	83.1272	298557	298.557	543.374	52.9718	40351	40.351	73.4389
258.311	15742	4.9137	324250	324.25	590.135	52.5696	45493.7	45.4937	82.7985	326830	326.83	594.831	52.5696	40161.6	40.1616	73.0941
424.336	32419	9.38526	1.19489e+06	1194.89	2174.71	45.213	42312.6	42.3126	77.0089	1.20939e+06	1209.39	2201.08	45.213	36833.1	36.8331	67.0363
296.206	20576	5.8058	452631	452.631	823.789	51.019	44804.1	44.8041	81.5435	452570	452.57	823.678	51.019	39438.8	39.4388	71.7785
222.721	10849	4.12881	234246	234.246	426.328	53.9431	46113.3	46.1133	83.9261	236959	236.959	431.266	53.9431	40811.7	40.8117	74.2772
259.268	16184	4.93548	327051	327.051	595.232	52.5314	45476.6	45.4766	82.7674	329598	329.598	599.868	52.5314	40143.7	40.1437	73.0615
276.405	20926	5.33193	380942	380.942	693.314	51.8396	45167.8	45.1678	82.2053	382596	382.596	696.325	51.8396	39819.9	39.8199	72.4721
214.588	13903	3.95599	217192	217.192	395.29	54.2438	46250	46.25	84.175	219680	219.68	399.817	54.2438	40955.2	40.9552	74.5385
114.897	6628	2.00752	83773.4	83.7734	152.468	57.2333	47631.3	47.6313	86.689	80784.6	80.7846	147.028	57.2333	42406.7	42.4067	77.1802
173.906	10431	3.12483	147972	147.972	269.31	55.6529	46896.1	46.8961	85.3509	148477	148.477	270.229	55.6529	41633.8	41.6338	75.7736
289.734	21084	5.64898	428034	428.034	779.022	51.2896	44923.7	44.9237	81.7612	428610	428.61	780.069	51.2896	39564.1	39.5641	72.0066
279.91	25556	5.41455	392871	392.871	715.026	51.6959	45103.9	45.1039	82.0891	394274	394.274	717.578	51.6959	39752.9	39.7529	72.3503
156.871	10519	2.79217	125716	125.716	228.804	56.1824	47141.2	47.1412	85.7969	125182	125.182	227.832	56.1824	41891.4	41.8914	76.2423
145.99	6550	2.58411	113221	113.221	206.062	56.4952	47286.5	47.2865	86.0615	112017	112.017	203.871	56.4952	42044.2	42.0442	76.5204
234.459	20318	4.38241	261041	261.041	475.095	53.5	45912.5	45.9125	83.5607	263930	263.93	480.353	53.5	40601	40.601	73.8937
240.217	15910	4.50867	275185	275.185	500.836	53.2789	45812.6	45.8126	83.379	278086	278.086	506.117	53.2789	40496.2	40.4962	73.7031
243.138	19881	4.57319	282622	282.622	514.372	53.1659	45761.7	45.7617	83.2862	285510	285.51	519.629	53.1659	40442.7	40.4427	73.6057
260.442	18633	4.96225	330515	330.515	601.538	52.4846	45455.6	45.4556	82.7293	333019	333.019	606.095	52.4846	40121.7	40.1217	73.0215
320.806	31877	6.41998	557060	557.06	1013.85	49.9699	44343.5	44.3435	80.7051	554097	554.097	1008.46	49.9699	38956.2	38.9562	70.9004
301.897	18402	5.9453	475228	475.228	864.916	50.7791	44698.4	44.6984	81.3511	474555	474.555	863.689	50.7791	39328	39.328	71.5769
295.598	24386	5.79099	450271	450.271	819.493	51.0445	44815.4	44.8154	81.564	450273	450.273	819.496	51.0445	39450.6	39.4506	71.8
287.242	21809	5.58911	418870	418.87	762.343	51.3932	44969.6	44.9696	81.8447	419671	419.671	763.802	51.3932	39612.1	39.6121	72.0941
305.633	21146	6.0377	490566	490.566	892.829	50.6207	44628.7	44.6287	81.2243	489466	489.466	890.827	50.6207	39255	39.255	71.4441
229.021	22319	4.2643	248296	248.296	451.899	53.7066	46006	46.006	83.7309	251128	251.128	457.052	53.7066	40699.1	40.6991	74.0723
164.016	13213	2.93065	134631	134.631	245.028	55.9657	47040.7	47.0407	85.6141	134537	134.537	244.857	55.9657	41785.8	41.7858	76.0501
302.654	25144	5.96397	478304	478.304	870.513	50.7471	44684.3	44.6843	81.3254	477545	477.545	869.132	50.7471	39313.2	39.3132	71.55
166.489	10299	2.97893	137855	137.855	250.896	55.8888	47005.1	47.0051	85.5494	137912	137.912	251.001	55.8888	41748.4	41.7484	75.9821
396.064	35210	8.50519	990695	990.695	1803.06	46.5673	42881.2	42.8812	78.0439	987954	987.954	1798.08	46.5673	37426.9	37.4269	68.117
302.087	20306	5.94998	475999	475.999	866.318	50.7711	44694.9	44.6949	81.3447	475304	475.304	865.053	50.7711	39324.3	39.3243	71.5702
312.114	24295	6.1996	518134	518.134	943.004	50.3442	44507.3	44.5073	81.0033	516258	516.258	939.59	50.3442	39127.8	39.1278	71.2126
375.618	36093	7.90436	855977	855.977	1557.88	47.5204	43285.9	43.2859	78.7804	849292	849.292	1545.71	47.5204	37849.8	37.8498	68.8867
392.062	31032	8.38535	963402	963.402	1753.39	46.7556	42960.9	42.9609	78.1888	959458	959.458	1746.21	46.7556	37510.1	37.5101	68.2684
330.395	27901	6.66759	602654	602.654	1096.83	49.5524	44161.5	44.1615	80.3738	598481	598.481	1089.24	49.5524	38765.7	38.7657	70.5535
213.053	12816	3.92363	214105	214.105	389.672	54.2999	46275.5	46.2755	84.2215	216542	216.542	394.106	54.2999	40982	40.982	74.5873
244.188	21169	4.59647	285340	285.34	519.319	53.1251	45743.3	45.7433	83.2528	288220	288.22	524.56	53.1251	40423.4	40.4234	73.5707
192.827	11435	3.50472	177076	177.076	322.279	55.0193	46604.5	46.6045	84.8201	178637	178.637	325.12	55.0193	41327.5	41.3275	75.216
297.323	25168	5.83306	456994	456.994	831.729	50.972	44783.4	44.7834	81.5058	456817	456.817	831.406	50.972	39417.1	39.4171	71.7391
391.32	32398	8.36326	958390	958.39	1744.27	46.7904	42975.6	42.9756	78.2156	954249	954.249	1736.73	46.7904	37525.5	37.5255	68.2965
245.072	15573	4.6161	287646	287.646	523.516	53.0907	45727.8	45.7278	83.2246	290517	290.517	528.742	53.0907	40407.2	40.4072	73.5411
166.561	9705	2.98034	137950	137.95	251.069	55.8866	47004.1	47.0041	85.5475	138012	138.012	251.181	55.8866	41747.3	41.7473	75.9801
465.001	37483	10.7673	1.51417e+06	1514.17	2755.79	43.1864	41475.4	41.4754	75.4853	1.59606e+06	1596.06	2904.82	43.1864	35960.1	35.9601	65.4473
260.404	17512	4.96139	330403	330.403	601.333	52.4861	45456.3	45.4563	82.7305	332908	332.908	605.892	52.4861	40122.4	40.1224	73.0228
317.386	22161	6.33282	541474	541.474	985.483	50.1176	44408.1	44.4081	80.8227	538943	538.943	980.876	50.1176	39023.9	39.0239	71.0235
230.58	17070	4.29805	251891	251.891	458.441	53.6476	45979.3	45.9793	83.6822	254743	254.743	463.632	53.6476	40671	40.671	74.0213
283.846	19729	5.50796	406650	406.65	740.103	51.5338	45031.9	45.0319	81.9581	407742	407.742	742.091	51.5338	39677.5	39.6775	72.213
229.871	14152	4.28269	250250	250.25	455.455	53.6745	45991.4	45.9914	83.7044	253093	253.093	460.63	53.6745	40683.8	40.6838	74.0445
365.29	25044	7.61122	792572	792.572	1442.48	47.9936	43488.3	43.4883	79.1487	785544	785.544	1429.69	47.9936	38061.4	38.0614	69.2718
349.674	30270	7.18033	702906	702.906	1279.29	48.6989	43791.6	43.7916	79.7007	696644	696.644	1267.89	48.6989	38378.6	38.3786	69.8491
329.293	20178	6.63889	597271	597.271	1087.03	49.6006	44182.4	44.1824	80.412	593235	593.235	1079.69	49.6006	38787.7	38.7877	70.5935
305.403	14584	6.032	489610	489.61	891.09	50.6305	44633	44.633	81.2321	488536	488.536	889.136	50.6305	39259.5	39.2595	71.4523
219.083	11900	4.05122	226470	226.47	412.175	54.0783	46174.7	46.1747	84.0379	229092	229.092	416.947	54.0783	40876.1	40.8761	74.3946
336.546	27492	6.82896	633386	633.386	1152.76	49.2821	44044	44.044	80.1601	628471	628.471	1143.82	49.2821	38642.8	38.6428	70.3298
341.285	20446	6.9547	657863	657.863	1197.31	49.0726	43953.2	43.9532	79.9947	652415	652.415	1187.4	49.0726	38547.7	38.5477	70.1568
256.197	17119	4.86571	318139	318.139	579.014	52.6535	45531.3	45.5313	82.867	320787	320.787	583.833	52.6535	40201.1	40.2011	73.166
331.49	17839	6.69617	608039	608.039	1106.63	49.5045	44140.6	44.1406	80.3359	603731	603.731	1098.79	49.5045	38743.8	38.7438	70.5138
174.036	8650	3.1274	148156	148.156	269.644	55.6487	46894.2	46.8942	85.3474	148669	148.669	270.577	55.6487	41631.8	41.6318	75.7698
284.546	18596	5.52465	409144	409.144	744.642	51.5048	45019.1	45.0191	81.9347	410178	410.178	746.523	51.5048	39664	39.664	72.1885
281.736	18586	5.4578	399213	399.213	726.567	51.6208	45070.5	45.0705	82.0284	400475	400.475	728.864	51.6208	39717.9	39.7179	72.2867
343.371	32037	7.01043	668859	668.859	1217.32	48.98	43913.1	43.9131	79.9218	663190	663.19	1207.01	48.98	38505.7	38.5057	70.0804
151.975	8208	2.69814	119938	119.938	218.287	56.3259	47207.8	47.2078	85.9182	119102	119.102	216.765	56.3259	41961.4	41.9614	76.3697
175.1	12432	3.14847	149666	149.666	272.392	55.6142	46878.2	46.8782	85.3184	150242	150.242	273.44	55.6142	41615.1	41.6151	75.7394
167.671	6592	3.00207	139422	139.422	253.748	55.8518	46988	46.988	85.5181	139551	139.551	253.983	55.8518	41730.4	41.7304	75.9493
186.073	10798	3.36782	166116	166.116	302.33	55.2503	46710.6	46.7106	85.0133	167318	167.318	304.52	55.2503	41438.9	41.4389	75.4188
252.349	13242	4.77882	307279	307.279	559.248	52.8057	45599.6	45.5996	82.9913	310029	310.029	564.254	52.8057	40272.7	40.2727	73.2963
219.839	13297	4.0673	228066	228.066	415.08	54.0503	46161.9	46.1619	84.0147	230708	230.708	419.889	54.0503	40862.8	40.8628	74.3703
198.616	10402	3.62323	187010	187.01	340.358	54.8174	46511.9	46.5119	84.6517	188855	188.855	343.717	54.8174	41230.3	41.2303	75.0391
279.818	17423	5.41237	392554	392.554	714.448	51.6997	45105.6	45.1056	82.0922	393963	393.963	717.013	51.6997	39754.7	39.7547	72.3535
217.168	13138	4.01056	222473	222.473	404.902	54.149	46206.8	46.2068	84.0964	225041	225.041	409.574	54.149	40909.9	40.9099	74.456
163.05	6968	2.91184	133391	133.391	242.772	55.9955	47054.5	47.0545	85.6392	133238	133.238	242.493	55.9955	41800.3	41.8003	76.0765
227.018	10695	4.22107	243747	243.747	443.62	53.7821	46040.2	46.0402	83.7932	246547	246.547	448.715	53.7821	40735	40.735	74.1377
336.822	35012	6.83625	634793	634.793	1155.32	49.27	44038.7	44.0387	80.1505	629846	629.846	1146.32	49.27	38637.2	38.6372	70.3198
356.236	25667	7.35964	739665	739.665	1346.19	48.404	43664.5	43.6645	79.4695	732935	732.935	1333.94	48.404	38245.7	38.2457	69.6072
308.909	24245	6.11928	504347	504.347	917.912	50.4812	44567.4	44.5674	81.1127	502860	502.86	915.205	50.4812	39190.8	39.1908	71.3272
226.144	17284	4.20225	241787	241.787	440.052	53.815	46055.1	46.0551	83.8203	244571	244.571	445.118	53.815	40750.6	40.7506	74.1662
119.18	6464	2.08542	87336.6	87.3366	158.953	57.1491	47591.9	47.5919	86.6172	84575.6	84.5756	153.928	57.1491	42365.2	42.3652	77.1046
324.265	21149	6.50875	573184	573.184	1043.19	49.8199	44278	44.278	80.5859	569781	569.781	1037	49.8199	38887.7	38.8877	70.7755
374.913	27954	7.88413	851547	851.547	1549.82	47.5529	43299.8	43.2998	78.8056	844810	844.81	1537.55	47.5529	37864.3	37.8643	68.9131
408.551	28392	8.88647	1.07855e+06	1078.55	1962.95	45.9745	42631.4	42.6314	77.5891	1.08131e+06	1081.31	1967.98	45.9745	37166	37.166	67.642
357.78	29055	7.40219	748509	748.509	1362.29	48.3343	43634.6	43.6346	79.4149	741696	741.696	1349.89	48.3343	38214.4	38.2144	69.5501
354.288	28543	7.30615	728613	728.613	1326.08	48.4918	43702.3	43.7023	79.5382	722003	722.003	1314.05	48.4918	38285.2	38.2852	69.6791
304.06	21321	5.99872	484059	484.059	880.987	50.6875	44658.1	44.6581	81.2777	483141	483.141	879.316	50.6875	39285.7	39.2857	71.5001
342.76	35507	6.99408	665624	665.624	1211.44	49.0071	43924.8	43.9248	79.9432	660019	660.019	1201.23	49.0071	38518	38.518	70.1028
364.79	27171	7.5972	789585	789.585	1437.04	48.0164	43498.1	43.4981	79.1665	782560	782.56	1424.26	48.0164	38071.6	38.0716	69.2903
212.859	13252	3.91955	213718	213.718	388.967	54.307	46278.8	46.2788	84.2274	216148	216.148	393.389	54.307	40985.4	40.9854	74.5935
297.175	23080	5.82945	456414	456.414	830.674	50.9783	44786.2	44.7862	81.5108	456252	456.252	830.379	50.9783	39419.9	39.4199	71.7443
148.857	10446	2.63861	116392	116.392	211.833	56.415	47249.2	47.2492	85.9936	115364	115.364	209.962	56.415	42004.9	42.0049	76.449
194.548	13410	3.53983	179976	179.976	327.557	54.9596	46577.1	46.5771	84.7703	181624	181.624	330.556	54.9596	41298.7	41.2987	75.1637
109.435	9032	1.90885	79434.2	79.4342	144.57	57.3303	47676.8	47.6768	86.7718	76165.6	76.1656	138.621	57.3303	42454.5	42.4545	77.2672
293.157	19758	5.73169	440899	440.899	802.436	51.1467	44860.6	44.8606	81.6462	441146	441.146	802.886	51.1467	39497.9	39.4979	71.8862
104.03	7075	1.81196	75356.2	75.3562	137.148	57.4131	47715.7	47.7157	86.8426	71823.3	71.8233	130.718	57.4131	42495.4	42.4954	77.3416
139.72	14366	2.46574	106573	106.573	193.963	56.6646	47365.4	47.3654	86.2051	104989	104.989	191.08	56.6646	42127.1	42.1271	76.6713
329.28	28372	6.63855	597208	597.208	1086.92	49.6012	44182.7	44.1827	80.4125	593173	593.173	1079.58	49.6012	38787.9	38.7879	70.594
253.331	13373	4.80094	310019	310.019	564.234	52.7669	45582.2	45.5822	82.9596	312745	312.745	569.197	52.7669	40254.5	40.2545	73.2631
281.193	17083	5.44492	397318	397.318	723.119	51.6432	45080.5	45.0805	82.0465	398622	398.622	725.493	51.6432	39728.3	39.7283	72.3056
179.097	13409	3.22794	155470	155.47	282.956	55.4834	46817.9	46.8179	85.2086	156280	156.28	284.429	55.4834	41551.7	41.5517	75.624
116.178	18690	2.03077	84824	84.824	154.38	57.2089	47619.9	47.6199	86.6682	81902.6	81.9026	149.063	57.2089	42394.6	42.3946	77.1582
291.45	24291	5.69038	434443	434.443	790.686	51.2181	44892.1	44.8921	81.7036	434857	434.857	791.439	51.2181	39530.9	39.5309	71.9463
299.853	19977	5.89502	467007	467.007	849.952	50.8655	44736.4	44.7364	81.4203	466558	466.558	849.136	50.8655	39367.8	39.3678	71.6495
370.123	27060	7.74756	821842	821.842	1495.75	47.7728	43393.8	43.3938	78.9767	814869	814.869	1483.06	47.7728	37962.6	37.9626	69.0919
159.697	12487	2.84677	129172	129.172	235.094	56.0977	47101.9	47.1019	85.7254	128813	128.813	234.439	56.0977	41850.1	41.8501	76.1671
225.954	15582	4.19816	241362	241.362	439.279	53.8221	46058.3	46.0583	83.8262	244143	244.143	444.34	53.8221	40754	40.754	74.1724
114.798	15079	2.00572	83692.7	83.6927	152.321	57.2352	47632.2	47.6322	86.6906	80698.8	80.6988	146.872	57.2352	42407.6	42.4076	77.1819
374.349	27177	7.86798	848014	848.014	1543.39	47.5788	43310.9	43.3109	78.8258	841239	841.239	1531.05	47.5788	37875.9	37.8759	68.9342
282.664	19573	5.47984	402469	402.469	732.494	51.5825	45053.6	45.0536	81.9975	403658	403.658	734.657	51.5825	39700.2	39.7002	72.2543
236.931	19852	4.43646	267030	267.03	485.995	53.4054	45869.7	45.8697	83.4829	269931	269.931	491.274	53.4054	40556.1	40.5561	73.8121
225.532	14750	4.18909	240422	240.422	437.568	53.838	46065.5	46.0655	83.8393	243195	243.195	442.614	53.838	40761.6	40.7616	74.1861
348.245	28230	7.14162	695078	695.078	1265.04	48.7628	43819.2	43.8192	79.7509	688940	688.94	1253.87	48.7628	38407.5	38.4075	69.9016
120.363	6951	2.10702	88346.5	88.3465	160.791	57.1247	47580.4	47.5804	86.5964	85649.7	85.6497	155.882	57.1247	42353.2	42.3532	77.0827
224.859	12568	4.17463	238930	238.93	434.853	53.8632	46077	46.077	83.8601	241689	241.689	439.874	53.8632	40773.6	40.7736	74.2079
266.719	19563	5.10635	349598	349.598	636.267	52.2328	45343	45.343	82.5243	351825	351.825	640.322	52.2328	40003.6	40.0036	72.8066
168.124	12822	3.01095	140027	140.027	254.849	55.8375	46981.4	46.9814	85.5061	140184	140.184	255.135	55.8375	41723.4	41.7234	75.9367
116.281	9841	2.03264	84909.1	84.9091	154.535	57.2069	47618.9	47.6189	86.6665	81993.1	81.9931	149.227	57.2069	42393.7	42.3937	77.1564
279.252	21892	5.399	390607	390.607	710.905	51.7229	45115.9	45.1159	82.1109	392059	392.059	713.547	51.7229	39765.5	39.7655	72.3732
321.268	21758	6.43181	559193	559.193	1017.73	49.9499	44334.7	44.3347	80.6892	556170	556.17	1012.23	49.9499	38947.1	38.9471	70.8837
257.327	22723	4.89134	321393	321.393	584.935	52.6087	45511.2	45.5112	82.8304	324006	324.006	589.69	52.6087	40180	40.18	73.1276
222.263	12990	4.11902	233254	233.254	424.522	53.9602	46121	46.121	83.9402	235956	235.956	429.44	53.9602	40819.8	40.8198	74.2921
325.169	28644	6.53205	577457	577.457	1050.97	49.7805	44260.8	44.2608	80.5547	573940	573.94	1044.57	49.7805	38869.7	38.8697	70.7429
193.362	13291	3.51562	177973	177.973	323.911	55.0008	46596	46.596	84.8047	179561	179.561	326.802	55.0008	41318.5	41.3185	75.1997
308.807	31437	6.11674	503913	503.913	917.122	50.4856	44569.3	44.5693	81.1162	502438	502.438	914.438	50.4856	39192.8	39.1928	71.3309
381.836	28721	8.08412	895683	895.683	1630.14	47.2328	43163.4	43.1634	78.5575	889667	889.667	1619.19	47.2328	37721.8	37.7218	68.6537
255.539	23985	4.85081	316258	316.258	575.59	52.6796	45543	45.543	82.8883	318926	318.926	580.445	52.6796	40213.4	40.2134	73.1883
151.726	8155	2.69337	119651	119.651	217.765	56.3331	47211.1	47.2111	85.9243	118799	118.799	216.215	56.3331	41964.9	41.9649	76.3761
228.369	20004	4.25021	246807	246.807	449.189	53.7312	46017.1	46.0171	83.7512	249629	249.629	454.324	53.7312	40710.8	40.7108	74.0936
307.171	23117	6.07594	496997	496.997	904.534	50.5553	44600	44.6	81.1719	495716	495.716	902.204	50.5553	39224.9	39.2249	71.3892
339.655	12323	6.91131	649366	649.366	1181.85	49.1448	43984.4	43.9844	80.0517	644096	644.096	1172.25	49.1448	38580.4	38.5804	70.2164
133.515	7542	2.34965	100366	100.366	182.666	56.8232	47439.5	47.4395	86.3398	98414.1	98.4141	179.114	56.8232	42204.9	42.2049	76.813
177.436	12023	3.19486	153033	153.033	278.519	55.538	46843.1	46.8431	85.2544	153746	153.746	279.817	55.538	41578.1	41.5781	75.6722
289.164	22569	5.63526	425923	425.923	775.18	51.3133	44934.2	44.9342	81.7803	426551	426.551	776.323	51.3133	39575.1	39.5751	72.0267
378.058	22898	7.9746	871423	871.423	1585.99	47.4078	43237.9	43.2379	78.693	864953	864.953	1574.21	47.4078	37799.7	37.7997	68.7954
278.009	23082	5.36967	386362	386.362	703.178	51.7739	45138.6	45.1386	82.1522	387903	387.903	705.984	51.7739	39789.2	39.7892	72.4164
138.356	7028	2.44013	105177	105.177	191.423	56.7002	47382.1	47.3821	86.2354	103512	103.512	188.392	56.7002	42144.6	42.1446	76.7032
112.692	9142	1.9676	81994.6	81.9946	149.23	57.274	47650.4	47.6504	86.7237	78891.3	78.8913	143.582	57.274	42426.7	42.4267	77.2166
252.248	19954	4.77655	306999	306.999	558.738	52.8097	45601.4	45.6014	82.9945	309751	309.751	563.747	52.8097	40274.6	40.2746	73.2997
61.794	5364	1.07897	49817.3	49.8173	90.6675	57.2713	47649.1	47.6491	86.7214	44708.4	44.7084	81.3693	57.2713	42425.4	42.4254	77.2142
64.488	2847	1.12449	51154.7	51.1547	93.1015	57.3484	47685.3	47.6853	86.7873	46119.2	46.1192	83.9369	57.3484	42463.5	42.4635	77.2835

## Sheet: volume-measurements
Volume [cm³]	Center line length [cm]	Side (L/R)
1069.26	39	L
1.215, 97	40.22	R
333.755	25.4	R
462.069	26.3	L
108.677	14.1	L
816.84	40.6	L
258.761	27.9	L
237.482	21.8	R
509.249	32.7	R
