# Supplementary material for: Age structure, carbonate production and shell loss rate in an Early Miocene reef of the giant oyster Crassostrea gryphoides
Source: Copernicus journal article supplement (doi:10.5194/bg-13-1223-2016), 2016-02-29
Supplement: Supplementary file [file bg-13-1223-2016-supplement-title-page.pdf › bg-13-1223-2016-supplement-title-page.pdf]

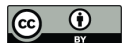

## *Supplement of*

# **Age structure, carbonate production and shell loss rate in an Early Miocene reef of the giant oyster *Crassostrea gryphoides***

**Mathias Harzhauser et al.**

*Correspondence to:* Mathias Harzhauser ([mathias.harzhauser@nhm-wien.ac.at](mailto:mathias.harzhauser@nhm-wien.ac.at))

- [bg-13-1223-2016-supplement-title-page.pdf](#)
- [Oysters-supplementary table.xlsx](#)

The copyright of individual parts of the supplement might differ from the CC-BY 3.0 licence.
